# Supplementary material for: Manifold lateralisation and variability in the language connectome at 7T
Source: Research Square preprint supplement (doi:10.21203/rs.3.rs-9267400/v1), 2026-05-05
Supplement: Supplementary file 1 [file 27a53ed992394393e21381cd.docx]

# ***Manifold lateralisation and variability in the language connectome at 7T***

The dataset was derived from 7 Tesla diffusion-weighted MRI data acquired from healthy young adult participants in the Human Connectome Project (n = 172; https://www.humanconnectome.org/ ). It was used to investigate hemispheric lateralisation and interhemispheric variability in language-recruited white-matter pathways. The collection includes diffusion MRI–derived individual whole-brain tractograms, manually dissected white-matter pathways for each participant, tract-specific quantitative metrics, behavioural measures, analysis scripts, and statistical analysis outputs.

<https://data.ru.nl/login/reviewer-3417446340/76TDQVSEJRA3HU7ZI23QG3LKPCMWDHF2OTVEQYA>
