# Supplementary material for: Manifold lateralisation and variability in the language connectome at 7T
Source: Research Square preprint supplement (doi:10.21203/rs.3.rs-9267400/v1), 2026-05-05
Supplement: Supplementary file 2 [file 40766f878feedec936372ba4.pdf]

## Supplementary material

### Manifold lateralisation and variability in the language connectome at 7T

Lilit Dulyan<sup>1-3\*</sup>, Cesare Bortolami<sup>4,5</sup>, Eva Guzmán Chacón<sup>1</sup>, Ahmad Beyh<sup>6</sup>, Michel Thiebaut de Schotten<sup>3,7</sup> & Stephanie J Forkel<sup>1-3\*</sup>

**Table 1.** Descriptive statistics for lateralisation indices (LI) across seven language-recruited white matter tracts in a cohort of 164 participants. For each tract and diffusion metric, the table reports the mean, standard deviation, median, and results of the Shapiro–Wilk test for normality. A p-value < 0.05 indicates a significant deviation from a normal distribution (highlighted in grey).

| Metric      | Tract | Average | St. dev. | Median | Shape of data distribution | Shapiro–Wilk test p values |
|-------------|-------|---------|----------|--------|----------------------------|----------------------------|
| HMOA        | AFI   | -0.076  | 0.054    | -0.073 |                            | 0.145                      |
| Track count | AFI   | -0.213  | 0.401    | -0.191 |                            | p < 0.05                   |
| Voxel count | AFI   | -0.139  | 0.252    | -0.144 |                            | 0.912                      |
| HMOA        | AFa   | 0.1     | 0.081    | 0.111  |                            | p < 0.001                  |
| Track count | AFa   | 0.245   | 0.473    | 0.305  |                            | p < 0.001                  |
| Voxel count | AFa   | 0.322   | 0.346    | 0.37   |                            | p < 0.05                   |
| HMOA        | AFp   | -0.013  | 0.059    | -0.013 |                            | 0.093                      |
| Track count | AFp   | -0.102  | 0.418    | -0.083 |                            | 0.29                       |
| Voxel count | AFp   | -0.08   | 0.29     | -0.071 |                            | 0.08                       |
| HMOA        | IFOF  | -0.028  | 0.043    | -0.023 |                            | 0.198                      |
| Track count | IFOF  | -0.001  | 0.361    | -0.038 |                            | 0.105                      |
| Voxel count | IFOF  | -0.023  | 0.209    | -0.028 |                            | 0.552                      |
| HMOA        | UF    | 0.071   | 0.095    | 0.058  |                            | p < 0.05                   |
| Track count | UF    | 0.318   | 0.375    | 0.383  |                            | p < 0.05                   |
| Voxel count | UF    | 0.323   | 0.298    | 0.348  |                            | 0.502                      |
| HMOA        | ILF   | -0.033  | 0.063    | -0.035 |                            | 0.182                      |
| Track count | ILF   | -0.277  | 0.359    | -0.326 |                            | p < 0.05                   |
| Voxel count | ILF   | -0.174  | 0.255    | -0.193 |                            | 0.162                      |
| HMOA        | FAT   | -0.022  | 0.048    | -0.025 |                            | 0.447                      |
| Track count | FAT   | -0.548  | 0.338    | -0.653 |                            | p < 0.001                  |
| Voxel count | FAT   | -0.339  | 0.311    | -0.34  |                            | p < 0.05                   |

*AFI: long segment of arcuate fasciculus, AFa: anterior segment of arcuate fasciculus, AFp: posterior segment of arcuate fasciculus, IFOF: inferior fronto-occipital fasciculus, UF: uncinate fasciculus, ILF: inferior longitudinal fasciculus, FAT: frontal aslant tract, HMOA: hindrance modulated orientational anisotropy.*

**Table 2.** Descriptive statistics of raw diffusion metrics per hemisphere across seven language-recruited white matter tracts in 172 participants. For each tract, the table reports the percentage of participants with successful reconstruction, the average value, standard deviation, median, and the distribution shape of each metric. Metrics include hindrance modulated orientational anisotropy (HMOA), track count, and voxel count. The distribution icons provide a visual summary of the data spread across participants.

| Side  | Metric      | Tract | Success of reconstruction | Average  | St. dev. | Median | Distribution |
|-------|-------------|-------|---------------------------|----------|----------|--------|--------------|
| Left  | HMOA        | AFI   | 99.42 %                   | 0.026    | 0.003    | 0.026  |              |
| Right | HMOA        | AFI   | 100 %                     | 0.022    | 0.002    | 0.022  |              |
| Left  | Track count | AFI   | 99.42 %                   | 397.585  | 235.819  | 346    |              |
| Right | Track count | AFI   | 100 %                     | 276.669  | 212.514  | 223.5  |              |
| Left  | Voxel count | AFI   | 99.42 %                   | 9848.561 | 2770.412 | 9923   |              |
| Right | Voxel count | AFI   | 100 %                     | 7873.57  | 3559.552 | 7540.5 |              |
| Left  | HMOA        | AFa   | 98.84 %                   | 0.02     | 0.004    | 0.02   |              |
| Right | HMOA        | AFa   | 100 %                     | 0.024    | 0.003    | 0.024  |              |
| Left  | Track count | AFa   | 98.84 %                   | 73.818   | 63.634   | 53.5   |              |
| Right | Track count | AFa   | 100 %                     | 138.773  | 122.588  | 112    |              |
| Left  | Voxel count | AFa   | 98.84 %                   | 2164.418 | 1378.059 | 2008.5 |              |
| Right | Voxel count | AFa   | 100 %                     | 4344.634 | 2217.278 | 4175.5 |              |
| Left  | HMOA        | AFp   | 100 %                     | 0.019    | 0.002    | 0.019  |              |
| Right | HMOA        | AFp   | 99.42 %                   | 0.018    | 0.002    | 0.019  |              |
| Left  | Track count | AFp   | 100 %                     | 271.541  | 159.276  | 243    |              |
| Right | Track count | AFp   | 99.42 %                   | 226.988  | 159.098  | 203    |              |
| Left  | Voxel count | AFp   | 100 %                     | 4098.233 | 1408.385 | 4219   |              |
| Right | Voxel count | AFp   | 99.42 %                   | 3586.064 | 1506.497 | 3550   |              |
| Left  | HMOA        | IFOF  | 100 %                     | 0.034    | 0.004    | 0.034  |              |
| Right | HMOA        | IFOF  | 100 %                     | 0.033    | 0.003    | 0.033  |              |
| Left  | Track count | IFOF  | 100 %                     | 160.378  | 101.262  | 137.5  |              |
| Right | Track count | IFOF  | 100 %                     | 164.674  | 118.476  | 140    |              |
| Left  | Voxel count | IFOF  | 100 %                     | 8206.901 | 2713.365 | 8072   |              |
| Right | Voxel count | IFOF  | 100 %                     | 7845.262 | 2627.782 | 7537.5 |              |
| Left  | HMOA        | UF    | 98.84 %                   | 0.018    | 0.003    | 0.019  |              |
| Right | HMOA        | UF    | 100 %                     | 0.021    | 0.002    | 0.021  |              |
| Left  | Track count | UF    | 98.84 %                   | 24.665   | 20.114   | 19     |              |
| Right | Track count | UF    | 100 %                     | 50.384   | 35.474   | 40     |              |
| Left  | Voxel count | UF    | 98.84 %                   | 1316.471 | 847.955  | 1255   |              |
| Right | Track count | UF    | 100 %                     | 2588.797 | 1341.312 | 2412.5 |              |
| Left  | HMOA        | ILF   | 100 %                     | 0.03     | 0.004    | 0.029  |              |
| Right | HMOA        | ILF   | 100 %                     | 0.028    | 0.003    | 0.027  |              |
| Left  | Track count | ILF   | 100 %                     | 121.401  | 81.057   | 101    |              |
| Right | Track count | ILF   | 100 %                     | 62.895   | 43.576   | 53     |              |
| Left  | Track count | ILF   | 100 %                     | 5738.797 | 2276.582 | 5590   |              |
| Right | Voxel count | ILF   | 100 %                     | 3996.89  | 1765.773 | 3823.5 |              |
| Left  | HMOA        | FAT   | 100 %                     | 0.014    | 0.001    | 0.014  |              |
| Right | HMOA        | FAT   | 98.26 %                   | 0.014    | 0.001    | 0.013  |              |
| Left  | Track count | FAT   | 100 %                     | 369.849  | 316.706  | 275.5  |              |
| Right | Track count | FAT   | 98.26 %                   | 84.923   | 71.723   | 64     |              |
| Left  | Voxel count | FAT   | 100 %                     | 4290.326 | 2191.34  | 3964   |              |
| Right | Voxel count | FAT   | 98.26 %                   | 2171.391 | 1418.526 | 1996   |              |

*AFI: long segment of arcuate fasciculus, AFa: anterior segment of arcuate fasciculus, AFp: posterior segment of arcuate fasciculus, IFOF: inferior fronto-occipital fasciculus, UF: uncinate fasciculus, ILF: inferior longitudinal fasciculus, FAT: frontal aslant tract, HMOA: hindrance modulated orientational anisotropy.*

**Table 3.** Results of the permutation analysis assessing interhemispheric variability (Variability Index, VI) across seven language-recruited tracts and three white matter metrics: hindrance modulated orientational anisotropy (HMOA), track count, and voxel count. The VI index reflects the relative variability between hemispheres, with negative values indicating greater variability in the left hemisphere and positive values indicating greater variability in the right hemisphere. P-values are derived from 100,000 permutations testing the null hypothesis of equal interhemispheric variability. Statistically significant results after Bonferroni correction (adjusted alpha = 0.0021 for 24 comparisons).

| Metric      | Tract   | VI index    | p-value |
|-------------|---------|-------------|---------|
| HMOA        | AFI     | -0.14508208 | 0.01185 |
| Track count | AFI     | 0.01431493  | 0.81293 |
| Voxel count | AFI     | 0.14789377  | 0.03171 |
| HMOA        | AFa     | 0.08651476  | 0.17211 |
| Track count | AFa     | 0.28431373  | 0.00025 |
| Voxel count | AFa     | 0.23738090  | 0.00021 |
| HMOA        | AFp     | 0.02728348  | 0.66204 |
| Track count | AFp     | -0.11568123 | 0.08820 |
| Voxel count | AFp     | 0.04563691  | 0.50930 |
| HMOA        | IFOF    | -0.12637746 | 0.02884 |
| Track count | IFOF    | -0.08225108 | 0.24972 |
| Voxel count | IFOF    | -0.05419510 | 0.36589 |
| HMOA        | UF      | -0.20324855 | 0.00963 |
| Track count | UF      | 0.30303030  | 0.00003 |
| Voxel count | UF      | 0.31873654  | 0.00002 |
| HMOA        | ILF     | 0.11786570  | 0.03962 |
| Track count | ILF     | -0.32867133 | 0.00000 |
| Voxel count | ILF     | -0.18732933 | 0.00072 |
| HMOA        | FAT     | 0.05843268  | 0.29175 |
| Track count | FAT     | -0.58252427 | 0.00000 |
| Voxel count | FAT     | -0.18649391 | 0.00361 |
| HMOA        | Average | -0.14200009 | 0.01783 |
| Track count | Average | -0.12035398 | 0.03160 |
| Voxel count | Average | 0.02747854  | 0.65717 |

*AFI: long segment of arcuate fasciculus, AFa: anterior segment of arcuate fasciculus, AFp: posterior segment of arcuate fasciculus, IFOF: inferior fronto-occipital fasciculus, UF: uncinate fasciculus, ILF: inferior longitudinal fasciculus, FAT: frontal aslant tract, HMOA: hindrance modulated orientational anisotropy, VI: variability index.*

**Table 4.** Posterior summary of the full Bayesian regression model predicting **Language processing (accuracy)** performance from lateralisation indices of language-recruited white matter tracts. Estimates (posterior means), standard errors, and 95% credible intervals for all regression coefficients are reported. Across all predictors, credible intervals included zero, indicating no robust evidence for an association between LI and behavioural performance.

| Predictor | Estimate | Est.Error | l-95% CI | u-95% CI | Rhat     | Bulk_ESS | Tail_ESS |
|-----------|----------|-----------|----------|----------|----------|----------|----------|
| Intercept | 95,35598 | 0,765659  | 93,80979 | 96,77632 | 1,000132 | 4880,633 | 3238,409 |
| HMOA_AFI  | -0,01056 | 0,481795  | -0,8973  | 0,890509 | 1,002759 | 4519,732 | 2087,69  |
| TC_AFI    | 0,059065 | 0,471398  | -0,85539 | 0,902664 | 1,002386 | 5124,381 | 1963,302 |
| VC_AFI    | 0,042845 | 0,483452  | -0,90002 | 0,92798  | 1,002277 | 4124,873 | 1925,155 |
| HMOA_AFa  | -0,00898 | 0,496463  | -0,91744 | 0,909615 | 1,000639 | 5466,819 | 2465,611 |
| TC_AFa    | -0,10828 | 0,459751  | -0,91552 | 0,814774 | 1,001022 | 3811,463 | 2048,844 |
| VC_AFa    | 0,039786 | 0,487319  | -0,87256 | 0,916552 | 1,000025 | 4817,323 | 2277,41  |
| HMOA_AFP  | 0,015211 | 0,506656  | -0,91886 | 0,929689 | 1,000337 | 4370,669 | 1797,927 |
| TC_AFP    | 0,167877 | 0,45593   | -0,78263 | 0,934105 | 1,001245 | 4943,78  | 2376,495 |
| VC_AFP    | 0,082838 | 0,48499   | -0,84866 | 0,912687 | 1,00193  | 4752,788 | 2560,529 |
| HMOA_IFOF | -0,00231 | 0,481279  | -0,88646 | 0,900608 | 1,002778 | 4659,314 | 2212,385 |
| TC_IFOF   | -0,06211 | 0,46104   | -0,91104 | 0,843658 | 1,001384 | 4361,377 | 2332,222 |
| VC_IFOF   | -0,03129 | 0,47276   | -0,89384 | 0,873532 | 1,000166 | 4832,534 | 2295,473 |
| HMOA_UF   | -0,05418 | 0,492779  | -0,93115 | 0,889765 | 1,002169 | 5023,9   | 1947,221 |
| TC_UF     | -0,214   | 0,472488  | -0,95723 | 0,817714 | 1,00041  | 4593,738 | 2248,57  |
| VC_UF     | -0,1665  | 0,468943  | -0,93816 | 0,808424 | 0,999772 | 4914,715 | 1794,754 |
| HMOA_ILF  | 0,018226 | 0,487928  | -0,88878 | 0,904851 | 1,002167 | 4802,355 | 2279,01  |
| TC_ILF    | 0,08632  | 0,476615  | -0,8563  | 0,927953 | 1,002633 | 4764,321 | 1813,527 |
| VC_ILF    | 0,08246  | 0,48217   | -0,86351 | 0,927329 | 1,000576 | 4687,92  | 2016,177 |
| HMOA_FAT  | 0,024162 | 0,481368  | -0,88219 | 0,907041 | 1,003226 | 4458,484 | 2031,507 |
| TC_FAT    | 0,0397   | 0,48963   | -0,87617 | 0,910581 | 1,002534 | 4804,302 | 2437,185 |
| VC_FAT    | 0,036547 | 0,48294   | -0,89869 | 0,914476 | 1,002675 | 5159,262 | 2069,985 |

**Table 5.** Posterior summary of the full Bayesian regression model predicting **Language processing (reaction time)** performance from lateralisation indices of language-recruited white matter tracts. Estimates (posterior means), standard errors, and 95% credible intervals for all regression coefficients are reported. Across all predictors, credible intervals included zero, indicating no robust evidence for an association between LI and behavioural performance.

| Predictor | Estimate | Est.Error | l-95% CI | u-95% CI | Rhat     | Bulk_ESS | Tail_ESS |
|-----------|----------|-----------|----------|----------|----------|----------|----------|
| Intercept | 3290,664 | 24,69292  | 3241,456 | 3338,821 | 0,99993  | 5026,528 | 3075,689 |
| HMOA_AFI  | 0,00119  | 0,493601  | -0,91429 | 0,908792 | 1,006454 | 4443,435 | 2081,961 |
| TC_AFI    | -0,01046 | 0,490698  | -0,90309 | 0,888323 | 1,002446 | 5000,665 | 2271,569 |
| VC_AFI    | -0,0101  | 0,497361  | -0,90301 | 0,903327 | 1,002137 | 4707,21  | 2218,235 |
| HMOA_AFa  | -0,01501 | 0,485835  | -0,9081  | 0,909483 | 1,008981 | 4361,091 | 2052,574 |
| TC_AFa    | -0,01391 | 0,494781  | -0,91815 | 0,88752  | 1,002053 | 3974,705 | 1472,187 |
| VC_AFa    | 0,008793 | 0,488547  | -0,89828 | 0,901689 | 1,001542 | 4318,198 | 1754,884 |
| HMOA_AFp  | 0,000348 | 0,503416  | -0,89601 | 0,90602  | 1,002961 | 4649,254 | 2444,642 |
| TC_AFp    | -0,01005 | 0,490266  | -0,90176 | 0,89477  | 1,002812 | 4236,205 | 1994,223 |
| VC_AFp    | 0,002968 | 0,495769  | -0,90896 | 0,892875 | 1,000703 | 5516,933 | 2396,409 |
| HMOA_IFOF | 0,007671 | 0,494077  | -0,89263 | 0,907449 | 1,000726 | 5152,173 | 2054,737 |
| TC_IFOF   | 0,011859 | 0,485085  | -0,89414 | 0,911319 | 1,002551 | 4386,468 | 2120,977 |
| VC_IFOF   | -0,01359 | 0,496495  | -0,92231 | 0,90384  | 1,001148 | 4891,812 | 2299,503 |
| HMOA_UF   | -0,00461 | 0,487964  | -0,90055 | 0,909484 | 1,00014  | 5264,599 | 2581,415 |
| TC_UF     | 0,005827 | 0,493892  | -0,91079 | 0,914413 | 1,00155  | 4192,263 | 1901,527 |
| VC_UF     | 0,003635 | 0,497278  | -0,89783 | 0,913505 | 1,000298 | 6257,65  | 2164,5   |
| HMOA_ILF  | -0,00191 | 0,506233  | -0,92372 | 0,906891 | 0,999797 | 5480,001 | 2284,58  |
| TC_ILF    | -0,0011  | 0,498393  | -0,92083 | 0,92012  | 1,001176 | 5067,683 | 1801,308 |
| VC_ILF    | -7,3E-06 | 0,494846  | -0,901   | 0,909526 | 1,000454 | 4573,417 | 2190,553 |
| HMOA_FAT  | -0,01354 | 0,483334  | -0,91426 | 0,896027 | 1,00016  | 4857,554 | 2337,445 |
| TC_FAT    | -0,01551 | 0,48617   | -0,89976 | 0,885531 | 1,002534 | 4892,023 | 2195,1   |
| VC_FAT    | -0,00178 | 0,493818  | -0,90873 | 0,910258 | 1,002726 | 4717,524 | 2070,048 |

**Table 6.** Posterior summary of the full Bayesian regression model predicting **Tone Discrimination (accuracy)** performance from lateralisation indices of language-recruited white matter tracts. Estimates (posterior means), standard errors, and 95% credible intervals for all regression coefficients are reported. Across all predictors, credible intervals included zero, indicating no robust evidence for an association between LI and behavioural performance.

| Predictor | Estimate | Est.Error | l-95% CI | u-95% CI | Rhat     | Bulk_ESS | Tail_ESS |
|-----------|----------|-----------|----------|----------|----------|----------|----------|
| Intercept | 4,296479 | 0,245893  | 3,82123  | 4,783916 | 1,000533 | 5064,078 | 3627,482 |
| HMOA_AFI  | -0,0096  | 0,482431  | -0,89187 | 0,893649 | 1,002343 | 3942,28  | 1888,764 |
| TC_AFI    | 0,039448 | 0,309689  | -0,57235 | 0,649271 | 1,002463 | 4481,556 | 2497,359 |
| VC_AFI    | -0,09582 | 0,420711  | -0,89766 | 0,747266 | 1,000748 | 4019,784 | 2109,057 |
| HMOA_AFa  | -0,11037 | 0,455115  | -0,91887 | 0,836098 | 1,002306 | 5509,739 | 2120,643 |
| TC_AFa    | -0,17384 | 0,306727  | -0,78598 | 0,423898 | 1,001315 | 4136,466 | 2025,75  |
| VC_AFa    | -0,04023 | 0,395187  | -0,8181  | 0,75841  | 1,001918 | 4615,385 | 2388,972 |
| HMOA_AFP  | 0,011344 | 0,479112  | -0,89855 | 0,898257 | 1,001216 | 5813,803 | 2361,902 |
| TC_AFP    | 0,087698 | 0,322534  | -0,54812 | 0,715331 | 1,003714 | 4441,474 | 2402,965 |
| VC_AFP    | -0,06995 | 0,416711  | -0,85749 | 0,7707   | 1,002149 | 3699,857 | 2508,989 |
| HMOA_IFOF | 0,098159 | 0,481544  | -0,85706 | 0,93787  | 1,002796 | 5620,739 | 2179,554 |
| TC_IFOF   | 0,446816 | 0,304315  | -0,17269 | 0,961007 | 1,000461 | 3899,554 | 1823,185 |
| VC_IFOF   | -0,19208 | 0,440301  | -0,92966 | 0,718696 | 1,000127 | 4407,178 | 2343,755 |
| HMOA_UF   | -0,18701 | 0,456404  | -0,93824 | 0,754389 | 1,00391  | 5739,552 | 2018,031 |
| TC_UF     | 0,320315 | 0,342011  | -0,37838 | 0,932116 | 0,999984 | 4429,005 | 2316,12  |
| VC_UF     | 0,039378 | 0,407834  | -0,76679 | 0,839527 | 1,000254 | 4655,358 | 2438,218 |
| HMOA_ILF  | -0,04076 | 0,454232  | -0,88408 | 0,856582 | 1,001559 | 7067,636 | 1851,239 |
| TC_ILF    | 0,182707 | 0,329383  | -0,46479 | 0,815662 | 1,000957 | 3899,248 | 2262,565 |
| VC_ILF    | -0,33824 | 0,394476  | -0,95893 | 0,51969  | 1,000081 | 3509,081 | 2091,493 |
| HMOA_FAT  | -0,10338 | 0,480911  | -0,92885 | 0,839009 | 1,002083 | 6877,668 | 2527,767 |
| TC_FAT    | 0,02883  | 0,378085  | -0,72004 | 0,781092 | 1,002283 | 4126,923 | 2453,87  |
| VC_FAT    | -0,1192  | 0,397688  | -0,86136 | 0,678335 | 1,001479 | 3884,132 | 2350,492 |

**Table 7.** Posterior summary of the full Bayesian regression model predicting **Picture Vocabulary (accuracy)** performance from lateralisation indices of language-recruited white matter tracts. Estimates (posterior means), standard errors, and 95% credible intervals for all regression coefficients are reported. Across all predictors, credible intervals included zero, indicating no robust evidence for an association between LI and behavioural performance.

| Predictor | Estimate | Est.Error | l-95% CI | u-95% CI | Rhat     | Bulk_ESS | Tail_ESS |
|-----------|----------|-----------|----------|----------|----------|----------|----------|
| Intercept | 111,1299 | 1,253424  | 108,6566 | 113,52   | 1,001036 | 5958,109 | 3050,404 |
| HMOA_AFl  | -0,02543 | 0,490803  | -0,91499 | 0,911818 | 1,000644 | 4920,179 | 1780,764 |
| TC_AFl    | -0,01837 | 0,472252  | -0,88913 | 0,879818 | 1,001557 | 5563,703 | 2254,862 |
| VC_AFl    | -0,03145 | 0,480924  | -0,91151 | 0,859301 | 1,001235 | 4476,367 | 2071,544 |
| HMOA_AFa  | -0,0257  | 0,501107  | -0,91786 | 0,916254 | 1,001816 | 5028,457 | 2190,893 |
| TC_AFa    | -0,07488 | 0,480077  | -0,91826 | 0,845435 | 1,001233 | 5640,652 | 2395,696 |
| VC_AFa    | -0,06371 | 0,487044  | -0,91355 | 0,870929 | 1,002731 | 4936,93  | 2316,015 |
| HMOA_AFp  | -0,01151 | 0,481945  | -0,88476 | 0,879374 | 1,001433 | 6185,793 | 2629,998 |
| TC_AFp    | 0,003365 | 0,489353  | -0,90035 | 0,907361 | 1,003928 | 5831,021 | 1974,792 |
| VC_AFp    | 0,019721 | 0,479493  | -0,86784 | 0,901215 | 1,003621 | 5193,596 | 2313,132 |
| HMOA_IFOF | 0,002092 | 0,492338  | -0,88965 | 0,901518 | 1,002549 | 5928,938 | 2033,152 |
| TC_IFOF   | -0,14199 | 0,477003  | -0,94854 | 0,852974 | 1,002729 | 3976,405 | 1644,85  |
| VC_IFOF   | -0,05087 | 0,498556  | -0,92092 | 0,891168 | 1,000432 | 5008,234 | 2332,292 |
| HMOA_UF   | 0,008311 | 0,503691  | -0,93445 | 0,921176 | 1,000655 | 5376,143 | 1851,627 |
| TC_UF     | -0,05935 | 0,489561  | -0,93222 | 0,880998 | 1,002532 | 4202,872 | 1656,351 |
| VC_UF     | -0,02004 | 0,499663  | -0,93528 | 0,913516 | 1,002726 | 5284,11  | 1839,423 |
| HMOA_ILF  | 0,003422 | 0,498661  | -0,91246 | 0,907055 | 1,005384 | 4551,16  | 2055,774 |
| TC_ILF    | -0,01598 | 0,480735  | -0,8936  | 0,86755  | 1,002022 | 5334,882 | 2153     |
| VC_ILF    | 0,040663 | 0,480333  | -0,87748 | 0,915317 | 1,003533 | 5381,233 | 1708,163 |
| HMOA_FAT  | 0,001165 | 0,484205  | -0,89305 | 0,909276 | 1,000477 | 5248,524 | 1903,214 |
| TC_FAT    | 0,162135 | 0,481878  | -0,81487 | 0,946656 | 1,000121 | 4675,029 | 2095,35  |
| VC_FAT    | 0,12868  | 0,469549  | -0,8292  | 0,932339 | 1,001812 | 5398,018 | 1934,658 |

**Table 8.** Posterior summary of the full Bayesian regression model predicting **Oral Reading Recognition (accuracy)** performance from lateralisation indices of language-recruited white matter tracts. Estimates (posterior means), standard errors, and 95% credible intervals for all regression coefficients are reported. Across all predictors, credible intervals included zero, indicating no robust evidence for an association between LI and behavioural performance.

| Predictor | Estimate | Est.Error | l-95% CI | u-95% CI | Rhat     | Bulk_ESS | Tail_ESS |
|-----------|----------|-----------|----------|----------|----------|----------|----------|
| Intercept | 109,0505 | 1,237996  | 106,6934 | 111,5358 | 1,000845 | 5521,775 | 3223,118 |
| HMOA_AFl  | -0,01829 | 0,495369  | -0,9194  | 0,907201 | 1,000764 | 4300,915 | 2284,135 |
| TC_AFl    | -0,03476 | 0,484525  | -0,91235 | 0,872736 | 1,000637 | 4530,323 | 2431,323 |
| VC_AFl    | -0,01548 | 0,489701  | -0,91562 | 0,891505 | 1,00082  | 5024,3   | 1813,039 |
| HMOA_AFa  | -0,01015 | 0,492217  | -0,90892 | 0,910107 | 1,004078 | 4550,412 | 1997,102 |
| TC_AFa    | -0,04031 | 0,4922    | -0,92641 | 0,882705 | 1,001591 | 4583,884 | 2025,192 |
| VC_AFa    | -0,01343 | 0,490289  | -0,90102 | 0,877234 | 1,003197 | 4894,698 | 1953,599 |
| HMOA_AFp  | -0,02286 | 0,504539  | -0,93199 | 0,922776 | 1,001853 | 5106,657 | 1981,554 |
| TC_AFp    | -0,01078 | 0,492643  | -0,90565 | 0,909119 | 1,00332  | 5022,461 | 2246,532 |
| VC_AFp    | -0,00618 | 0,480756  | -0,87545 | 0,896345 | 1,000488 | 5299,607 | 2516,34  |
| HMOA_IFOF | -0,00063 | 0,49102   | -0,89183 | 0,891816 | 1,000816 | 5252,198 | 2188,397 |
| TC_IFOF   | -0,14297 | 0,474788  | -0,94473 | 0,840814 | 1,003247 | 4228,651 | 1975,805 |
| VC_IFOF   | -0,01135 | 0,49308   | -0,91961 | 0,902309 | 1,001308 | 5066,756 | 2086,482 |
| HMOA_UF   | 0,022871 | 0,487513  | -0,87621 | 0,898946 | 1,002312 | 4575,201 | 2261,485 |
| TC_UF     | 0,012377 | 0,489487  | -0,88837 | 0,908249 | 1,000961 | 4935,754 | 2083,24  |
| VC_UF     | 0,046826 | 0,490391  | -0,88663 | 0,925525 | 1,002622 | 4798,455 | 2212,944 |
| HMOA_ILF  | 0,017432 | 0,487944  | -0,88532 | 0,916234 | 1,002966 | 4560,197 | 2191,741 |
| TC_ILF    | 0,034648 | 0,482991  | -0,8762  | 0,91819  | 1,000806 | 5395,864 | 2094,446 |
| VC_ILF    | 0,033568 | 0,493291  | -0,86918 | 0,906646 | 1,000664 | 5439,386 | 2584,283 |
| HMOA_FAT  | -0,00776 | 0,478527  | -0,89583 | 0,882678 | 1,001972 | 5371,321 | 2212,164 |
| TC_FAT    | 0,132457 | 0,471982  | -0,80457 | 0,925407 | 1,002585 | 4986,839 | 2341,518 |
| VC_FAT    | 0,115546 | 0,487156  | -0,85634 | 0,937742 | 1,000282 | 4804,649 | 2066,414 |

**Table 9. Overview of Common Diffusion-Based White Matter Atlases.** This table summarises key characteristics of white matter atlases based on diffusion tractography. Each atlas is evaluated for its inclusion of major tract classes—association fibres, commissural fibres, projection fibres, U-fibres, and cerebellar fibres—as well as sample size and demographics. We indicate the tractography algorithm used (e.g. tensor-based, UKF, CSD) and whether key language-recruited tracts are included or missing, with tract definitions based on commonly accepted anatomical conventions. The final column notes whether the tract dissection was performed manually, automatically, or through a hybrid approach. Tract abbreviations: AFl = long segment of arcuate fasciculus, AFa = anterior segment, AFp = posterior segment, IFOF = inferior fronto-occipital fasciculus, ILF = inferior longitudinal fasciculus, UF = uncinate fasciculus, FAT = frontal aslant tract, tSLF = superior longitudinal fasciculus - temporal branch. Algorithm abbreviations: T-B = tensor-based, SD = spherical deconvolution, CSD = constrained spherical deconvolution, MSMT-CSD = multi-shell multi-tissue CSD, MSCM-SD = multi-shell compartment spherical deconvolution, UKF = Unscented Kalman Filter, AFQ = Automated Fibre Quantification, QBI = Q-ball imaging, QSDR = Q-space diffeomorphic reconstruction. Dataset abbreviations: HCP = Human Connectome Project, BLSA = Baltimore Longitudinal Study of Aging, VU = Vanderbilt University, CHCP = Chinese Connectome Project. N.R.: not reported, N.p.: number of participants.

| Atlas                                | N Asso. fibers | N Com. fibres | N Proj. fibers | N U-fibers | N Cereb. fibers | N p. | Demographics<br>Mean age, SD, sex                                                           | Algorithm              | Language - recruited tracts <u>included</u> | Language - recruited tracts <u>missing</u> | Dissection method |
|--------------------------------------|----------------|---------------|----------------|------------|-----------------|------|---------------------------------------------------------------------------------------------|------------------------|---------------------------------------------|--------------------------------------------|-------------------|
| Catani et al. 2002                   | 6              | 2             | 2              | 0          | 0               | 1    | 39 y.o. male                                                                                | T-B                    | AFI/SLF, ILF, UF, IFOF                      | AFa, AFp, FAT                              | manual            |
| Catani and Thiebaut de Schotten 2008 | 5              | 2             | 2              | 0          | 3               | 12   | NR, 34.3 ± 5.7, 100% M.                                                                     | T-B                    | AFI, ILF, UF, IFOF                          | AFa, AFp, FAT                              | manual            |
| Hua et al. 2008                      | 7              | 2             | 2              | 0          | 0               | 28   | NR, 29 ± 7.9; 39% F.                                                                        | T-B                    | tSLF, ILF, UF, IFOF                         | AFI, AFa, AFp, FAT                         | manual            |
| Mori et al. 2008                     | 11             | 3             | 12             | 0          | 3               | 81   | 18–59, 38.63±NR; 48 % F.                                                                    | T-B                    | ILF, UF, IFOF                               | AFI, AFa, AFp, FAT                         | manual            |
| Rojkova et al. 2016                  | 13             | 3             | 5              | 15         | 0               | 57   | 22-71, 45.45 ±14.79, 50% F.                                                                 | SD                     | AFI, AFa, AFp, ILF, UF, IFOF, FAT           |                                            | manual            |
| Wakana et al. 2007                   | 7              | 2             | 2              | 0          | 0               | 10   | NR, 26.1± 5.48, 50% F.                                                                      | T-B                    | ILF, UF, IFOF                               | AFL, AFa, AFp, FAT                         | manual            |
| Maffei et al. 2021                   | 10             | 9             | 6              | 0          | 1               | 16   | NR, HCP                                                                                     | CSD & MSMT-CSD         | AFI, UF, ILF, FAT                           | AFa, AFp, IFOF                             | manual            |
| Radwan et al. 2022                   | 15             | 8             | 12             | 0          | 3               | 20   | 22-35, NR, 50% F.                                                                           | MSMT-CSD               | AFI, ILF, UF, IFOF, FAT                     | AFa, AFp                                   | hybrid            |
| Li et al. 2024                       | 11             | 7             | 10             | 8          | 6               | 306  | 22-37, 24.2 ± 1.4, 47% F. (west, n=153, HCP); 22-37, 23.9 ± 2.4; 44% F. (east, n=153, CHCP) | UKF                    | AFI, ILF, UF, IFOF                          | AFa, AFp, FAT                              | hybrid            |
| Zhang et al. 2018                    | 12             | 7             | 9              | 8          | 5               | 100  | 22–36, 29.1±3.7, 54% F.                                                                     | UKF                    | AFI, ILF, UF, IFOF                          | AFa, AFp, FAT                              | hybrid            |
| Mori et al. 2005                     | 5              | 1             | 9              | 0          | 3               | 1    | NR                                                                                          | T-B                    | ILF, UF, IFOF                               | AFI, AFa, AFp, FAT                         | manual            |
| Hansen et al. 2021                   | 7              | 2             | 2              | 0          | 0               | 2326 | 22-35, 28.8 ± 3.5, 54% F. (HCP); 22.4-95.1, 66.2 ±                                          | T-B; AFQ & AFQ-clipped | AFI, ILF, UF, IFOF                          | AFa, AFp, FAT                              | automatic         |

|                         |    |   |    |                                    |   |    |                                                       |                         |                              |                                   |        |
|-------------------------|----|---|----|------------------------------------|---|----|-------------------------------------------------------|-------------------------|------------------------------|-----------------------------------|--------|
|                         | 7  | 2 | 10 | 0                                  | 3 |    | 14.82, 55% F. (BLSA); 18-75, 29.7 ± 11.5, 56% F. (VU) | SD; Recobundles         | AFI, ILF, IFOF, UF, FAT      | AFa, AFp,                         |        |
|                         | 9  | 9 | 20 | 0                                  | 3 |    |                                                       | CSD; TractSeg           | AFI, ILF, UF, IFOF           | AFa, AFp, FAT                     |        |
|                         | 6  | 2 | 2  | 0                                  | 0 |    |                                                       | Ball-and-stick; Tracula | ILF, UF                      | AFI, AFa, AFp, IFOF, FAT          |        |
|                         | 12 | 3 | 7  | 0                                  | 1 |    |                                                       | Ball-and-stick; Xtract  | AFI, ILF, UF, IFOF, FAT      | AFa, AFp                          |        |
| Hagler et al. 2009      | 7  | 3 | 3  | 0                                  | 0 | 21 | 21–52, 33 ± 10.2, 52% F.                              | T-B                     | tSLF, ILF, UF, IFOF          | AFI, AFa, AFp, FAT                | manual |
| Yendiki et al. 2011     | 6  | 2 | 2  | 0                                  | 0 | 33 | NR, 42±10, 42% F.                                     | T-B                     | tSLF, ILF, UF                | AFI, AFa, AFp, IFOF, FAT          | manual |
| Suarez et al. 2012      | 2  | 1 | 3  | 0                                  | 0 | 20 | NR, 17.8 ± 1.1, 50% F.                                | T-B                     | -                            | AFI, AFa, AFp, ILF, IFOF, UF, FAT | manual |
| Ros et al. 2013         | 5  | 2 | 2  | 0                                  | 0 | 15 | NR                                                    | T-B                     | tSLF, ILF, IFOF, UF          | AFI, AFa, AFp, FAT                | hybrid |
| van Baarsen et al. 2016 | 0  | 0 | 0  | 0                                  | 3 | 90 | 22-35, 30, 61% F.                                     | Ball-and-Stick model    | -                            | AFI, AFa, AFp, ILF, IFOF, UF, FAT | hybrid |
| Tang et al. 2018        | 0  | 0 | 6  | 0                                  | 6 | 20 | NR, 50% (HCP)                                         | MSCM-SD                 | -                            | AFI, AFa, AFp, ILF, IFOF, UF, FAT | manual |
| Guevara et al. 2012     | 9  | 4 | 6  | 47 (left)<br>47(symmetrised right) | 0 | 12 | NR, adults                                            | SD                      | AFI, AFa, AFp, ILF, IFOF, UF | FAT                               | hybrid |

|                                  |    |   |                     |                            |   |     |                         |      |                              |                                   |           |
|----------------------------------|----|---|---------------------|----------------------------|---|-----|-------------------------|------|------------------------------|-----------------------------------|-----------|
| Guevara et al. 2017              | 0  | 0 | 0                   | 50                         | 0 | 79  | NR; 23.6±5.2; 39% F.    | QBI  | -                            | AFI, AFa, AFp, ILF, IFOF, UF, FAT | automatic |
| Román et al. 2017                | 0  | 0 | 0                   | 44 (left)<br>49 (right)    | 0 | 74  | NR, 23.6 ± 5.2; 42% F.  | QBI  | -                            | AFI, AFa, AFp, ILF, IFOF, UF, FAT | automatic |
| Román et al. 2022                | 0  | 0 | 0                   | 267 (left);<br>258 (right) | 0 | 100 | NR (HCP)                | CSD  | -                            | AFI, AFa, AFp, ILF, IFOF, UF, FAT | automatic |
| O'Donnell and Westin 2007        | 5  | 1 | 2                   | 0                          | 2 | 10  | NR                      | T-B  | AFI, ILF, IFOF, UF           | AFa, AFp, FAT                     | hybrid    |
| Yeh et al. 2018                  | 10 | 3 | 17+5 cranial nerves | 1 (combined)               | 5 | 842 | 22-36, NR, 56% F. (HCP) | QSDR | AFI, ILF, IFOF, UF, FAT      | AFa, AFp                          | hybrid    |
| Yoo et al. 2015                  | 5  | 0 | 2                   | 0                          | 0 | 12  | 21-40, 32.8±5.5, 100% M | QBI  | ILF, IFOF, UF                | AFI, AFa, AFp, FAT                | hybrid    |
| O'Donnell et al. 2017            | 4  | 0 | 1                   | 0                          | 0 | 10  | NR (HCP)                | UKF  | AFI, ILF, IFOF, UF           | AFI, AFa, AFp, FAT                | hybrid    |
| Thiebaut de Schotten et al. 2011 | 7  | 2 | 6                   | 3                          | 0 | 40  | 18-22, NR, 50% fem.     | T-B  | AFI, AFa, AFp, ILF, IFOF, UF | FAT                               | manual    |

**Table 10.** This table provides an overview of published and unpublished studies reporting hemispheric asymmetries in white matter tracts commonly associated with language. Reported measures include HMOA (Hindrance Modulated Orientational Anisotropy), tract volume, number of streamlines, and fractional anisotropy (FA). Each entry specifies the tractography method used, sample size (N), demographic details (age, sex), statistical test employed, and success rate of reconstruction of white matter tract in the left and right hemisphere in %. AFl: long segment of arcuate fasciculus, AFa: anterior segment of arcuate fasciculus, AFp: posterior segment of arcuate fasciculus, IFOF: inferior fronto-occipital fasciculus, UF: uncinate fasciculus, ILF: inferior longitudinal fasciculus, FAT: frontal aslant tract, HMOA: hindrance modulated orientational anisotropy, SR: Success rate, NR: not reported, N: sample size; #: The information was extracted based on the reported data; Algorithm abbreviations: T-B = tensor-based, SD = spherical deconvolution, CSD = constrained spherical deconvolution, GQI = Generalized Q-Sampling Imaging

|      | Study                     | HMOA       | Volume     | Streamlines | FA        | Algorithm | N   | Demogr.                           | Stat. Test                                   | SR (left,%) | SR (right,%) |
|------|---------------------------|------------|------------|-------------|-----------|-----------|-----|-----------------------------------|----------------------------------------------|-------------|--------------|
| FAT  | Catani et al. 2012        | -          | left       | -           | -         | SD        | 13  | NR                                | unpaired t-test                              | NR          | NR           |
|      | Briggs et al. 2019        | -          | bilateral  | -           | -         | GQI       | 10  | 23-34,<br>29.4±3.9,<br>60% F. #   | unpaired t-test                              | NR          | NR           |
|      | Guzman et al, unpublished | left       | bilateral  | bilateral   | bilateral | SD        | 198 | 18-30, 23±3,<br>73% F.            | one-sample t-test                            | 100%        | 100%         |
|      | Rojkova et al. 2016       | bilateral# | bilateral# | -           | right#    | SD        | 57  | 22-71, 45.45<br>±14.79, 50%<br>F. | summary stats<br>based on unpaired<br>t-test | 100%        | 100%         |
|      | This study                | left       | left       | left        | -         | SD        | 172 | 22-36,<br>29.3±3.3,<br>61% F.     | one-sample t-test                            | 100%        | 98,26%       |
| IFOF | Briggs et al. 2019        | -          | bilateral  | -           | -         | GQI       | 10  | 23-34,<br>29.4±3.9,<br>60% F. #   | unpaired t-test                              | NR          | NR           |
|      | Forkel et al. 2014        | -          | bilateral  | -           | -         | SD        | 30  | 23-37, NR,<br>43% F.              | one-sample t-test                            | 100%        | 100%         |
|      | Guzman et al, unpublished | left       | bilateral  | bilateral   | left      | SD        | 198 | 18-30, 23±3,<br>73% F.            | one-sample t-test                            | 100%        | 100%         |

|     |                                     |            |            |           |            |     |     |                                   |                                                |      |        |
|-----|-------------------------------------|------------|------------|-----------|------------|-----|-----|-----------------------------------|------------------------------------------------|------|--------|
|     | Rojkova et al. 2016                 | bilateral# | bilateral# | -         | bilateral# | SD  | 57  | 22-71, 45.45<br>±14.79, 50%<br>F. | summary stats<br>based on unpaired<br>t-test # | 100% | 100%   |
|     | Shu et al. 2015                     | -          | -          | bilateral | left       | T-B | 72  | NR,<br>23.4±3.7,<br>42% F.        | paired t-test                                  | 100% | 79,2%  |
|     | Thiebaut de Schotten et al.<br>2011 | -          | bilateral  | right     | bilateral  | T-B | 40  | 18-22, NR,<br>50% F.              | one-sample t-test                              | 100% | 100%   |
|     | Wu et al. 2016                      | -          | bilateral  | -         | -          | GQI | 10  | 23-40, NR,<br>70% F.              | paired t-test                                  |      |        |
|     | This study                          | left       | bilateral  | bilateral | -          | SD  | 172 | 22-36,<br>29.3±3.3,<br>61% F.     | one-sample t-test                              | 100% | 98,26% |
| ILF | Latini et al. 2017                  | -          | right      | -         | bilateral  | T-B | 24  | 21-28, NR,<br>NR                  | unpaired t-test                                | 100% | 100%   |
|     | Shu et al. 2015                     | -          | -          | left      | left       | T-B | 72  | NR,<br>23.4±3.7,<br>42% F.        | paired t-test                                  | 100% | 79,2%  |
|     | Thiebaut de Schotten et al.<br>2011 | -          | bilateral  | bilateral | left       | T-B | 40  | 18-22, NR,<br>50% F.              | one-sample t-test                              | 100% | 100%   |

|     |                                     |            |            |                             |           |     |     |                                   |                                                |      |        |
|-----|-------------------------------------|------------|------------|-----------------------------|-----------|-----|-----|-----------------------------------|------------------------------------------------|------|--------|
|     | This study                          | left       | left       | left                        | -         | SD  | 172 | 22-36,<br>29.3±3.3,<br>61% F.     | one-sample t-test                              | 100% | 98,26% |
| UF  | Briggs et al. 2019                  | -          | bilateral  | -                           | -         | GQI | 10  | 23-34,<br>29.4±3.9,<br>60% F.#    | unpaired t-test                                | NR   | NR     |
|     | Guzman et al, unpublished           | bilateral  | right      | right                       | bilateral | SD  | 198 | 18-30, 23±3,<br>73% F.            | one-sample t-test                              | 100% | 100%   |
|     | Rojkova et al. 2016                 | bilateral# | bilateral# | -                           | right#    | SD  | 57  | 22-71, 45.45<br>±14.79, 50%<br>F. | summary stats<br>based on unpaired<br>t-test # | 100% | 100%   |
|     | Shu et al. 2015                     | -          | -          | right                       | bilateral | T-B | 72  | NR,<br>23.4±3.7,<br>42% F.        | paired t-test                                  | 100% | 79,2%  |
|     | Thiebaut de Schotten et al.<br>2011 | -          | bilateral  | bilateral                   | bilateral | T-B | 40  | 18-22, NR,<br>50% F.              | one-sample t-test                              | 100% | 100%   |
|     | This study                          | right      | right      | right                       | -         | SD  | 172 | 22-36,<br>29.3±3.3,<br>61% F.     | one-sample t-test                              | 100% | 98,26% |
| AFI | Catani et al. 2007                  | -          | -          | 3 groups<br>(majority left) | left      | T-B | 40  | 18-22, NR,<br>50% F.              | one-sample t-test;<br>k-means                  | 100% | 37,5%  |

|     |                                  |            |         |       |           |     |     |                             |                                          |      |        |
|-----|----------------------------------|------------|---------|-------|-----------|-----|-----|-----------------------------|------------------------------------------|------|--------|
|     | Guzman et al, unpublished        | left       | left    | left  | bilateral | SD  | 198 | 18-30, 23±3, 73% F.         | one-sample t-test                        | 100% | 100%   |
|     | Rojkova et al. 2016              | bilateral# | left #  | -     | right #   | SD  | 57  | 22-71, 45.45 ±14.79, 50% F. | summary stats based on unpaired t-test # | 94%  | 100%   |
|     | Thiebaut de Schotten et al. 2011 | -          | left    | left  | bilateral | T-B | 40  | 18-22, NR, 50% F.           | one-sample t-test                        | 100% | 40%    |
|     | This study                       | left       | left    | left  | -         | SD  | 172 | 22-36, 29.3±3.3, 61% F.     | one-sample t-test                        | 100% | 98,26% |
| AFa | Catani et al. 2007               | -          | -       | -     | right     | T-B | 40  | 18-22, NR, 50% F.           | one-sample t-test                        | 100% | 100%   |
|     | Guzman et al, unpublished        | bilateral  | right   | right | bilateral | SD  | 198 | 18-30, 23±3, 73% F.         | one-sample t-test                        | 100% | 100%   |
|     | Rojkova et al. 2016              | right #    | right # | -     | right #   | SD  | 57  | 22-71, 45.45 ±14.79, 50% F. | summary stats based on unpaired t-test # | 100% | 100%   |
|     | Thiebaut de Schotten et al. 2011 | -          | right   | right | right     | T-B | 40  | 18-22, NR, 50% F.           | one-sample t-test                        | 100% | 100%   |

|     |                                  |           |                    |                    |           |     |     |                               |                   |      |        |
|-----|----------------------------------|-----------|--------------------|--------------------|-----------|-----|-----|-------------------------------|-------------------|------|--------|
|     | This study                       | right     | right              | right              | -         | SD  | 172 | 22-36,<br>29.3±3.3,<br>61% F. | one-sample t-test | 100% | 98,26% |
| AFp | Catani et al. 2007               | -         | -                  | -                  | NR        | T-B | 40  | 18-22, NR,<br>50% F.          | one-sample t-test | 100% | 100%   |
|     | Thiebaut de Schotten et al. 2011 | -         | bilateral          | bilateral          | bilateral | T-B | 40  | 18-22, NR,<br>50% F.          | one-sample t-test | 100% | 100%   |
|     | This study                       | bilateral | left<br>(marginal) | left<br>(marginal) | -         | SD  | 172 | 22-36,<br>29.3±3.3,<br>61% F. | one-sample t-test | 100% | 98,26% |
| AF  | Shu et al. 2015                  | -         | -                  | left               | left      | T-B | 72  | NR,<br>23.4±3.7,<br>42% F.    | paired t-test     | 100% | 79,2%  |
|     | Thiebaut de Schotten et al. 2011 | -         | right              | bilateral          | bilateral | T-B | 40  | 18-22, NR,<br>50% F.          | one-sample t-test | 100% | 100%   |

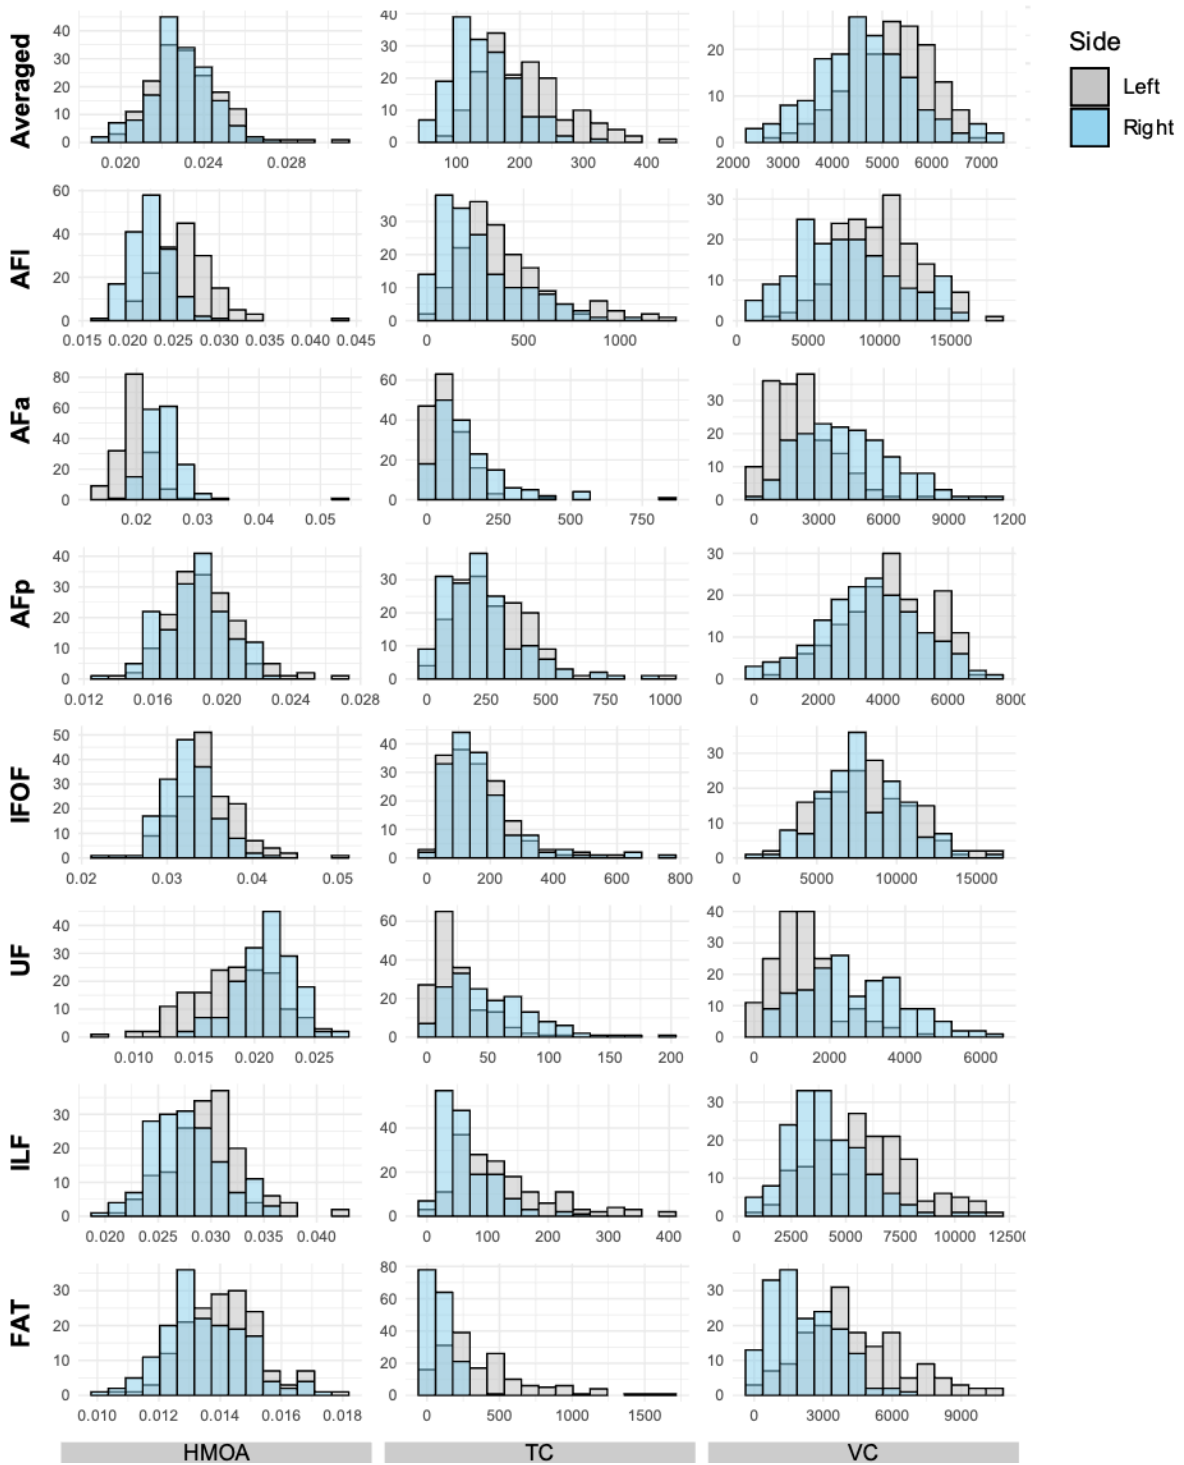

**Figure 1.** Distribution of raw tract-specific values for the left (light red) and right (light blue) hemispheres across participants. Each plot illustrates the respective metric's interindividual spread and central tendency, highlighting hemispheric differences in the magnitude and variability of white matter properties.

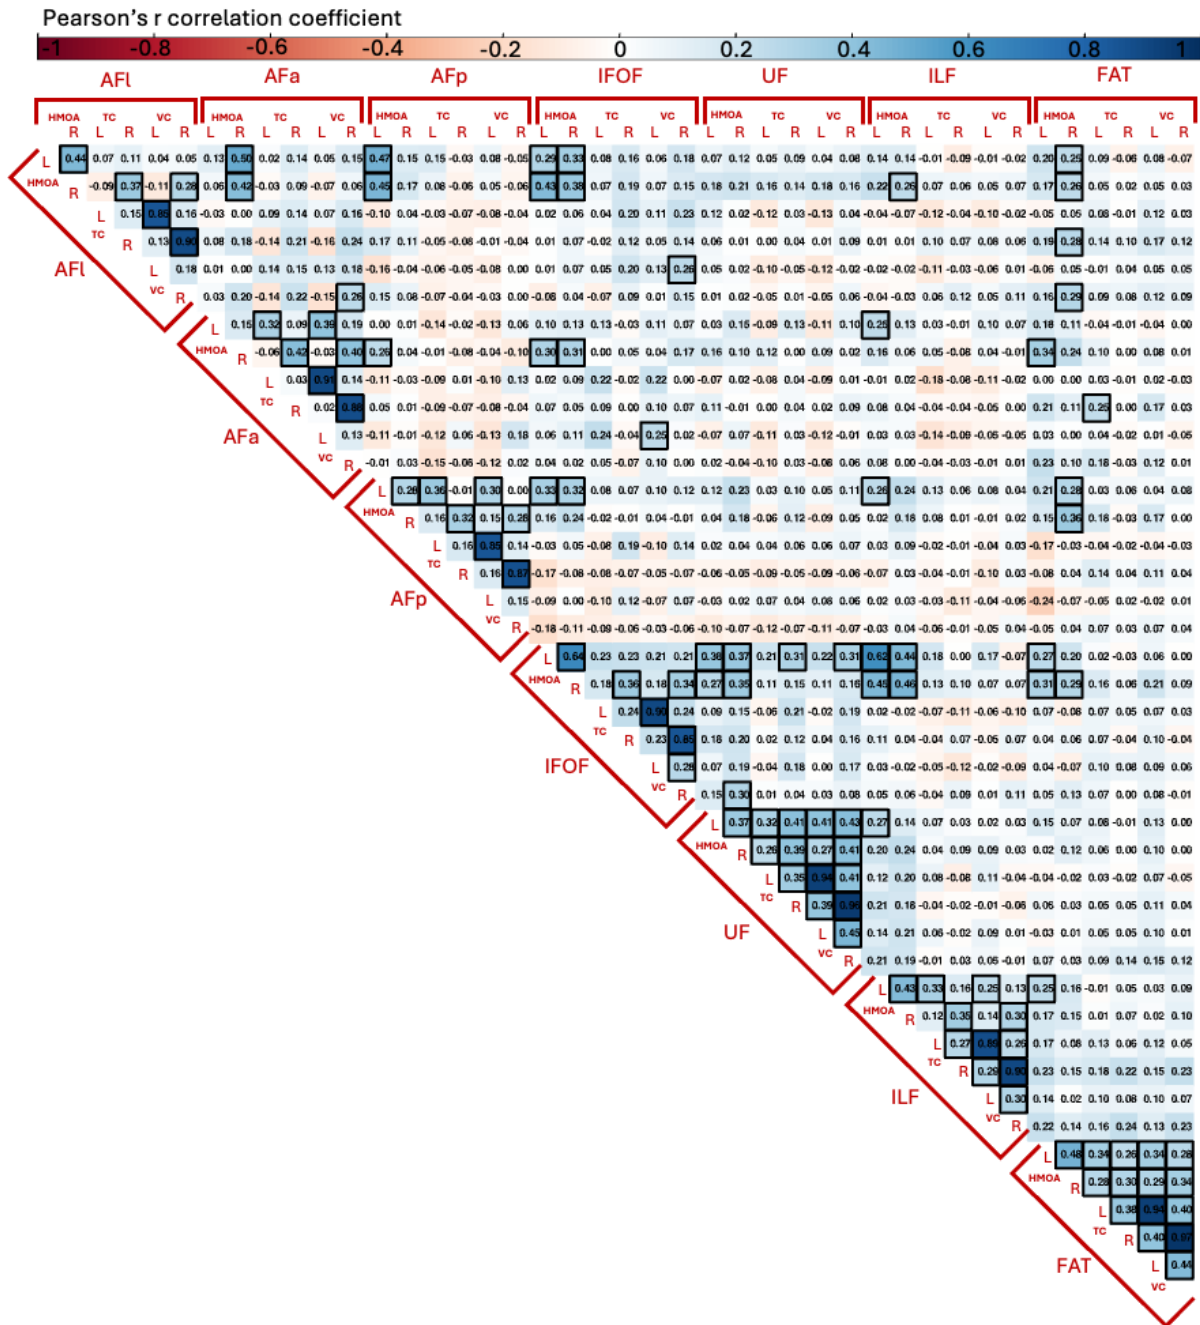

**Figure 2.** Correlation matrix of raw structural metrics (voxel count, streamline count, and HMOA) across language-relevant tracts in each hemisphere. Voxel and streamline counts show strong positive correlations within tracts, indicating high metric agreement for tract size. In contrast, HMOA is only weakly correlated with volumetric measures, reflecting its distinct sensitivity to microstructural properties. Squares indicate significant correlations (Bonferroni-corrected).

To better understand consistency across structural metrics, we computed intercorrelations between voxel count, streamline count, and HMOA for each tract within each hemisphere (see Supplementary Figure 2). As expected, voxel count and streamline count were highly correlated within each tract and hemisphere (Bonferroni-corrected  $r$  values often  $> 0.95$ ), indicating that these metrics largely capture the same anatomical variance, most likely reflecting overall tract size. In contrast, HMOA showed weak or no correlation with either voxel or streamline count across tracts ( $r \approx 0$  to  $0.3$ ), suggesting it reflects a distinct microstructural property (e.g., fibre integrity or

orientation dispersion) that is not reducible to tract volume. This dissociation helps explain why lateralisation and behavioural correlations involving HMOA may diverge from those based on voxel or streamline count and supports the inclusion of all three metrics in analyses aiming to disentangle size-based and microstructural contributions to function.

# TC AFp

Post. Mean = -0.107, CI [-0.17, -0.04], BF10 =  $1.15 \times 10^1$  at width = 0.707

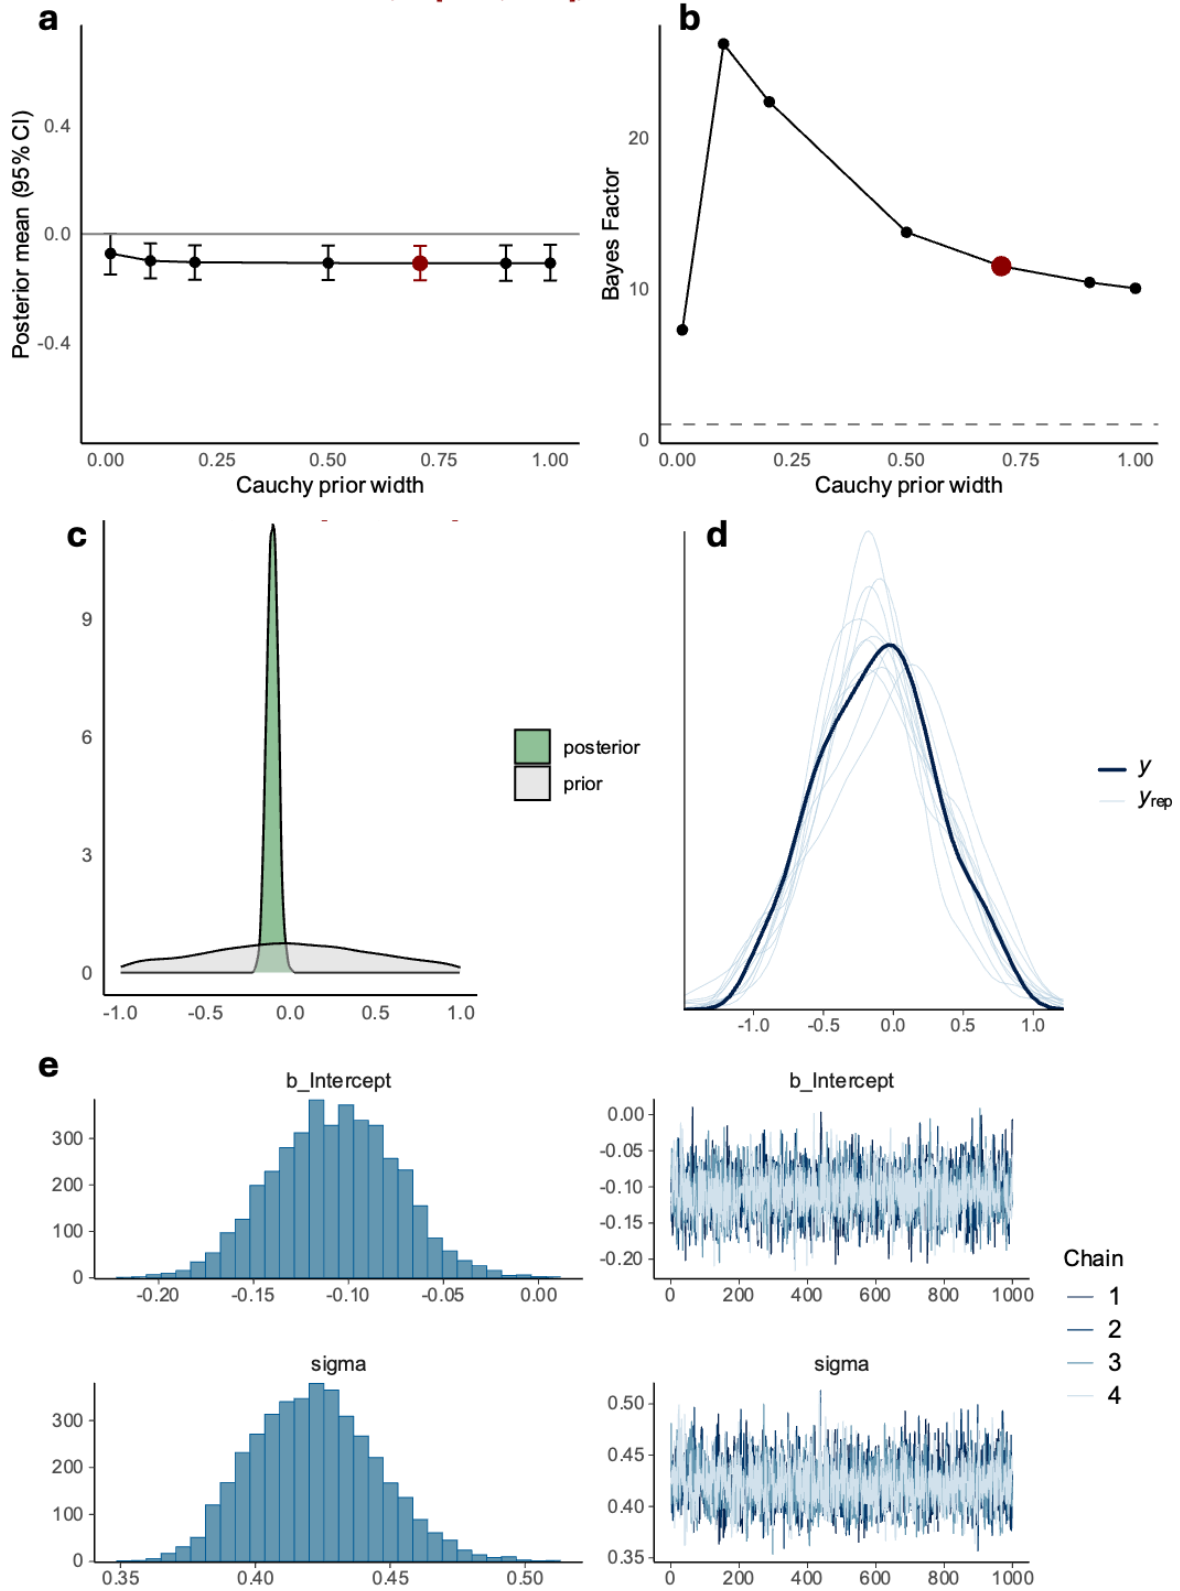

**Figure 3.** Robustness, posterior predictive checks, and convergence diagnostics for Bayesian lateralisation models. This is an example for the posterior arcuate fasciculus (pAF). Similar figures were generated for all 21 tract x metric combinations, each following the same processing and visualization pipeline, and are available in the Radboud Data Repository folder “Data\_analysis/results/Bayesian/Lateralisation” (<https://doi.org/10.34973/e0fm-pr30>). (a) Posterior mean estimates ( $\pm 95\%$  credible intervals) across varying Cauchy prior widths. The posterior mean at chosen width = 0.707 (highlighted in red) was  $-0.107$  (95% CI  $[-0.17, -0.04]$ ). This plot shows how the estimated effect (posterior mean) changes depending on the prior width. The red point highlights the chosen prior width (0.707), where the effect is negative and statistically meaningful. (b) Bayes Factor ( $BF_{10}$ ) as a function of Cauchy prior width. At chosen width = 0.707,  $BF_{10} = 11.5$  (red point). This plot shows how much evidence the data provides in favor of an effect (Bayes Factor). At 0.707, the Bayes Factor is about 11.5, which indicates moderate-to-strong evidence. However, compared to other metrics and tracts, where Bayes Factors ranged from 93463 up to  $2.97 \times 10^{44}$ , this value is much lower. (c) Prior (gray) and posterior (green) distributions of the parameter estimate, indicating a posterior shift toward negative values relative to the prior. The green distribution is the posterior (updated belief after seeing data), and the gray distribution is the prior (belief before data). The posterior is narrower and shifted left, suggesting a stronger belief in a negative effect. (d) Posterior predictive distributions across sampling chains, demonstrating overlap and consistency across four chains. Each line shows results from a different sampling chain. The overlap of chains suggests the results are stable and reliable. (e) Parameter diagnostics. Left: Histograms of posterior samples for the intercept (top) and sigma (bottom). Right: Trace plots for the intercept and sigma across iterations for four chains, showing good chain mixing and convergence. The histograms show the distribution of sampled values for key parameters, and the trace plots show how the chains evolved over time. The good mixing of chains suggests convergence and reliable inference.

## Analysis 1: Frequentistic approach in white matter lateralisation

To assess the statistical significance of white matter lateralisation, we conducted one-sample t-tests comparing each tract's lateralisation index (LI) to zero (i.e. no lateralisation), similar to previous studies (Briggs et al. 2019; Latini et al. 2017; Thiebaut de Schotten et al. 2011). The alpha threshold was adjusted using Bonferroni correction, setting the significance level to 0.0024 (0.05/[7 tracts × 3 measures]).

Most tracts were strongly asymmetrical with a preference for the left hemisphere. This included the long segment of the arcuate fasciculus, the ILF, and the FAT across all white matter properties (i.e., HMOA, TC, VC;  $p < 0.0024$ , Figure A and Table A). The pathways with a right asymmetry include the uncinate fasciculus and the anterior segment of the arcuate fasciculus, which showed statistically significant rightward lateralisation in HMOA, TC, and VC ( $p < 0.0024$ ; Table A and Figure B).

A less clear pattern was evident for the IFOF and the posterior segment of the arcuate fasciculus. The IFOF was significantly left lateralised for HMOA ( $t(163) = -8.41, p < .0024, M = -0.028, SD = 0.043, 99.8\% CI [-0.038, -0.018], Cohen's d = -0.657$ ), but bilateral for track count ( $t(163) = -0.12, p = 0.9008, M = -0.004, SD = 0.361, 99.8\% CI [-0.091, 0.084], Cohen's d = -0.01$ ) and voxel count ( $t(163) = -1.5, p = 0.1359, M = -0.024, SD = 0.208, 99.8\% CI [-0.075, 0.026], Cohen's d = -0.117$ ). The posterior segment of the arcuate fasciculus exhibited the opposite pattern. HMOA was bilateral ( $t(163) = -2.83, p = 0.0052, M = -0.013, SD = 0.06, 99.8\% CI [-0.028, 0.001], Cohen's d = -0.221$ ), but left lateralised for track count ( $t(163) = -3.30, p = 0.001, M = -0.108, SD = 0.419, 99.8\% CI [-0.209, -0.007], Cohen's d = -0.258$ ) and voxel count ( $t(163) = -3.58, p = 0.0004, M = -0.081, SD = 0.291, 99.8\% CI [-0.152, -0.011], Cohen's d = -0.280$ ). However, the upper bound of the confidence intervals track and voxel count for AFp approached zero (i.e., no lateralisation), meaning both are statistically close to being bilateral (see Figure B for the bootstrap analysis).

**Table A.** Results of the statistical analysis of lateralisation. Adjusted significance level = 0.0024 (0.05/[7 tracts × 3 measures]).

| LI index | Tract | Df  | T stats. | P value      | Mean   | SD    | CI lower | CI upper | Cohen's d |
|----------|-------|-----|----------|--------------|--------|-------|----------|----------|-----------|
| HMOA     | AFI   | 163 | -18.13   | $p < 0.0024$ | -0.077 | 0.054 | -0.09    | -0.064   | -1.416    |
| TC       | AFI   | 163 | -7.27    | $p < 0.0024$ | -0.226 | 0.399 | -0.322   | -0.13    | -0.568    |
| VC       | AFI   | 163 | -7.49    | $p < 0.0024$ | -0.147 | 0.252 | -0.208   | -0.087   | -0.585    |
| HMOA     | AFa   | 163 | 15.7     | $p < 0.0024$ | 0.1    | 0.082 | 0.08     | 0.12     | 1.226     |
| TC       | AFa   | 163 | 6.72     | $p < 0.0024$ | 0.245  | 0.467 | 0.132    | 0.358    | 0.524     |
| VC       | AFa   | 163 | 12.14    | $p < 0.0024$ | 0.322  | 0.34  | 0.24     | 0.405    | 0.948     |
| HMOA     | AFp   | 163 | -2.83    | 0.0052       | -0.013 | 0.06  | -0.028   | 0.001    | -0.221    |
| TC       | AFp   | 163 | -3.3     | 0.0012       | -0.108 | 0.419 | -0.209   | -0.007   | -0.258    |
| VC       | AFp   | 163 | -3.58    | 0.0004       | -0.081 | 0.291 | -0.152   | -0.011   | -0.28     |
| HMOA     | IFOF  | 163 | -8.41    | $p < 0.0024$ | -0.028 | 0.043 | -0.038   | -0.018   | -0.657    |
| TC       | IFOF  | 163 | -0.12    | 0.9008       | -0.004 | 0.361 | -0.091   | 0.084    | -0.01     |
| VC       | IFOF  | 163 | -1.5     | 0.1359       | -0.024 | 0.208 | -0.075   | 0.026    | -0.117    |
| HMOA     | UF    | 163 | 9.8      | $p < 0.0024$ | 0.073  | 0.096 | 0.05     | 0.097    | 0.765     |
| TC       | UF    | 163 | 11.13    | $p < 0.0024$ | 0.324  | 0.373 | 0.234    | 0.414    | 0.869     |

|      |     |     |        |              |        |       |        |        |        |
|------|-----|-----|--------|--------------|--------|-------|--------|--------|--------|
| VC   | UF  | 163 | 14.26  | $p < 0.0024$ | 0.327  | 0.293 | 0.256  | 0.397  | 1.113  |
| HMOA | ILF | 163 | -6.62  | $p < 0.0024$ | -0.033 | 0.063 | -0.048 | -0.017 | -0.517 |
| TC   | ILF | 163 | -9.57  | $p < 0.0024$ | -0.271 | 0.363 | -0.359 | -0.184 | -0.747 |
| VC   | ILF | 163 | -8.32  | $p < 0.0024$ | -0.167 | 0.258 | -0.229 | -0.105 | -0.65  |
| HMOA | FAT | 163 | -6.03  | $p < 0.0024$ | -0.023 | 0.048 | -0.034 | -0.011 | -0.471 |
| TC   | FAT | 163 | -20.84 | $p < 0.0024$ | -0.55  | 0.338 | -0.632 | -0.469 | -1.628 |
| VC   | FAT | 163 | -14.05 | $p < 0.0024$ | -0.341 | 0.311 | -0.416 | -0.266 | -1.097 |

*AFI: long segment of arcuate fasciculus, AFa: anterior segment of arcuate fasciculus, AFp: posterior segment of arcuate fasciculus, IFOF: inferior fronto-occipital fasciculus, UF: uncinete fasciculus, ILF: inferior longitudinal fasciculus, FAT: frontal aslant tract, HMOA: hindrance modulated orientational anisotropy, Df: degrees of freedom, CI: 99.76% confidence interval (Bonferroni adjusted CI), SD: standard deviation, TC: track count, VC: voxel count*

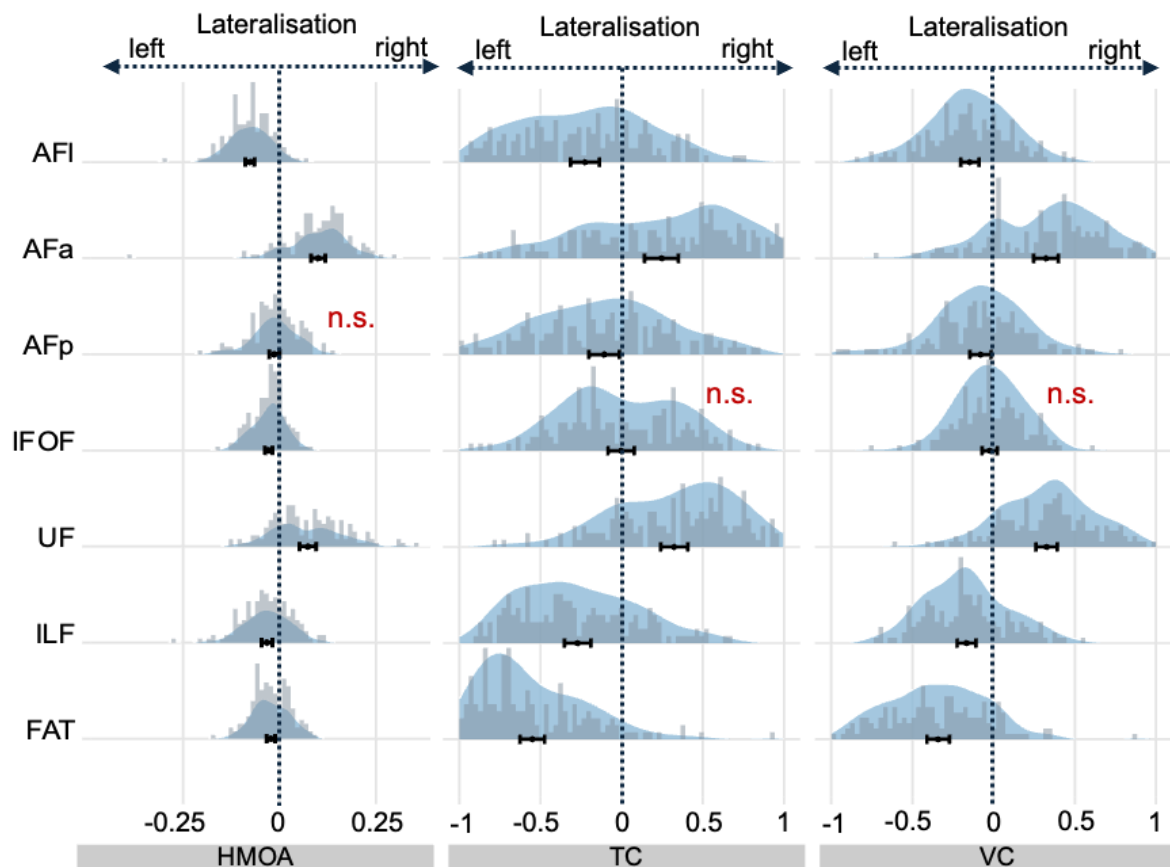

**Figure A.** Hemispheric asymmetry in language-recruited tracts across three white matter properties: hindrance modulated orientational anisotropy (HMOA), track count (TC), and voxel count (VC). The mean lateralisation index (LI) for each tract is plotted with Bonferroni-corrected 99.8% confidence intervals ( $n = 164$ ). Grey histograms and overlaid blue density plots illustrate the distribution of LI values across participants. Negative LI values indicate leftward lateralisation; positive values indicate rightward lateralisation. AFI = long segment of the arcuate fasciculus; AFa = anterior segment of the arcuate fasciculus; AFp = posterior segment of the arcuate fasciculus; IFOF = inferior fronto-occipital fasciculus; UF = uncinete fasciculus; ILF = inferior longitudinal fasciculus; FAT = frontal aslant tract; n.s. = non-significant.

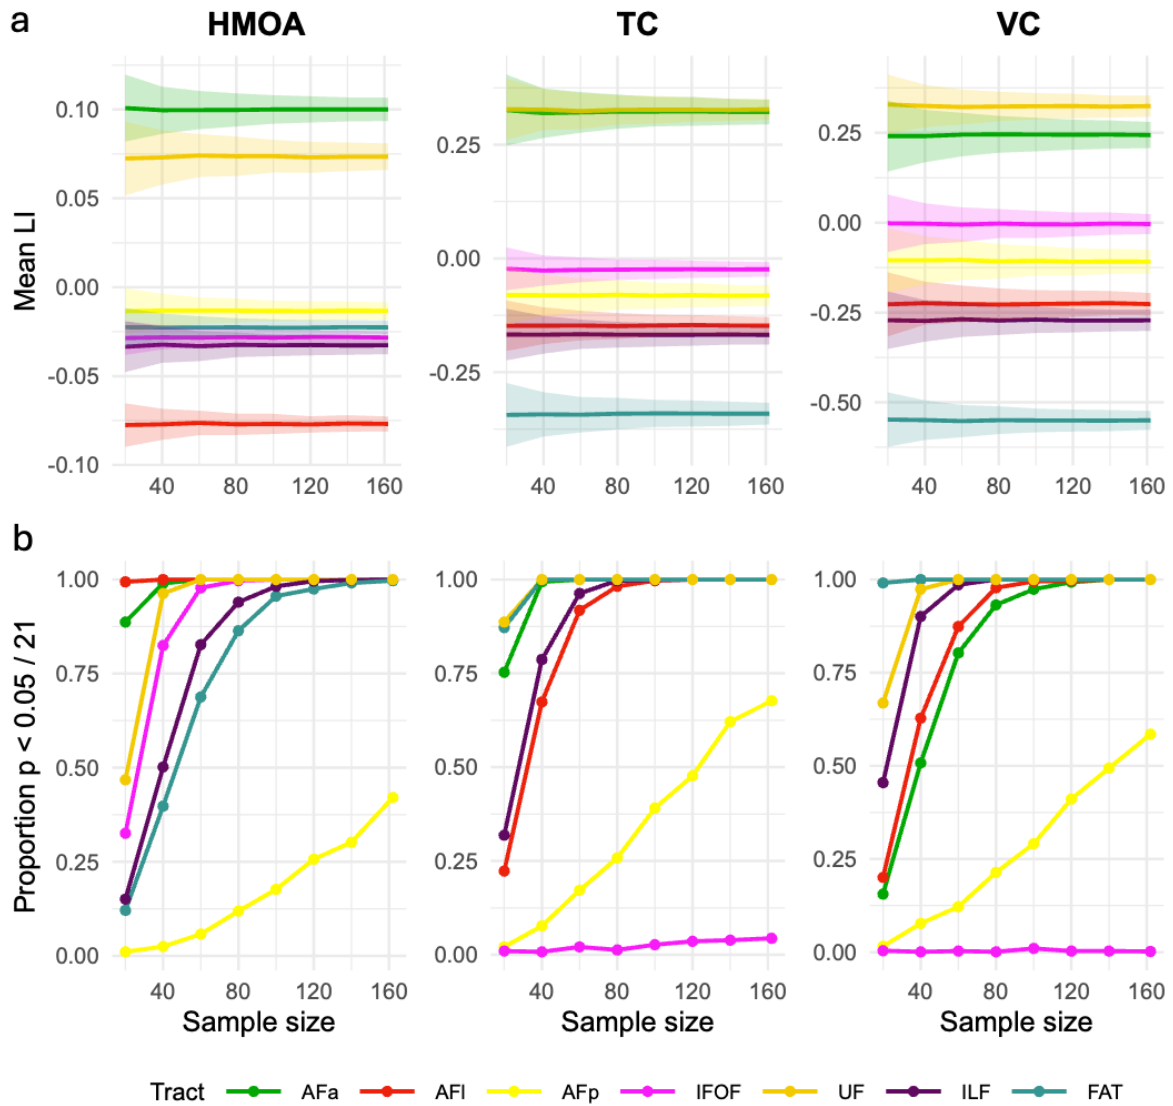

**Figure B.** Stability of tract-specific lateralisation as a function of sample size. a: Mean lateralisation index (LI) across 1,000 bootstrap resamples for each tract and metric, with shaded ribbons representing  $\pm 1$  standard deviation. Increasing sample size reduces variability and stabilises LI estimates, revealing which tracts show robust lateralisation patterns at higher sample sizes. b: Proportion of significant lateralisation effects ( $p < 0.05/21$ ) across the same bootstrap samples. Values  $> 0.5$  indicate that more than half of the samples showed a significant effect, reflecting consistent lateralisation beyond chance. Some tracts show reliable lateralisation even at smaller sample sizes, whereas others—such as AFp across several metrics—require larger samples for stable and statistically significant detection.

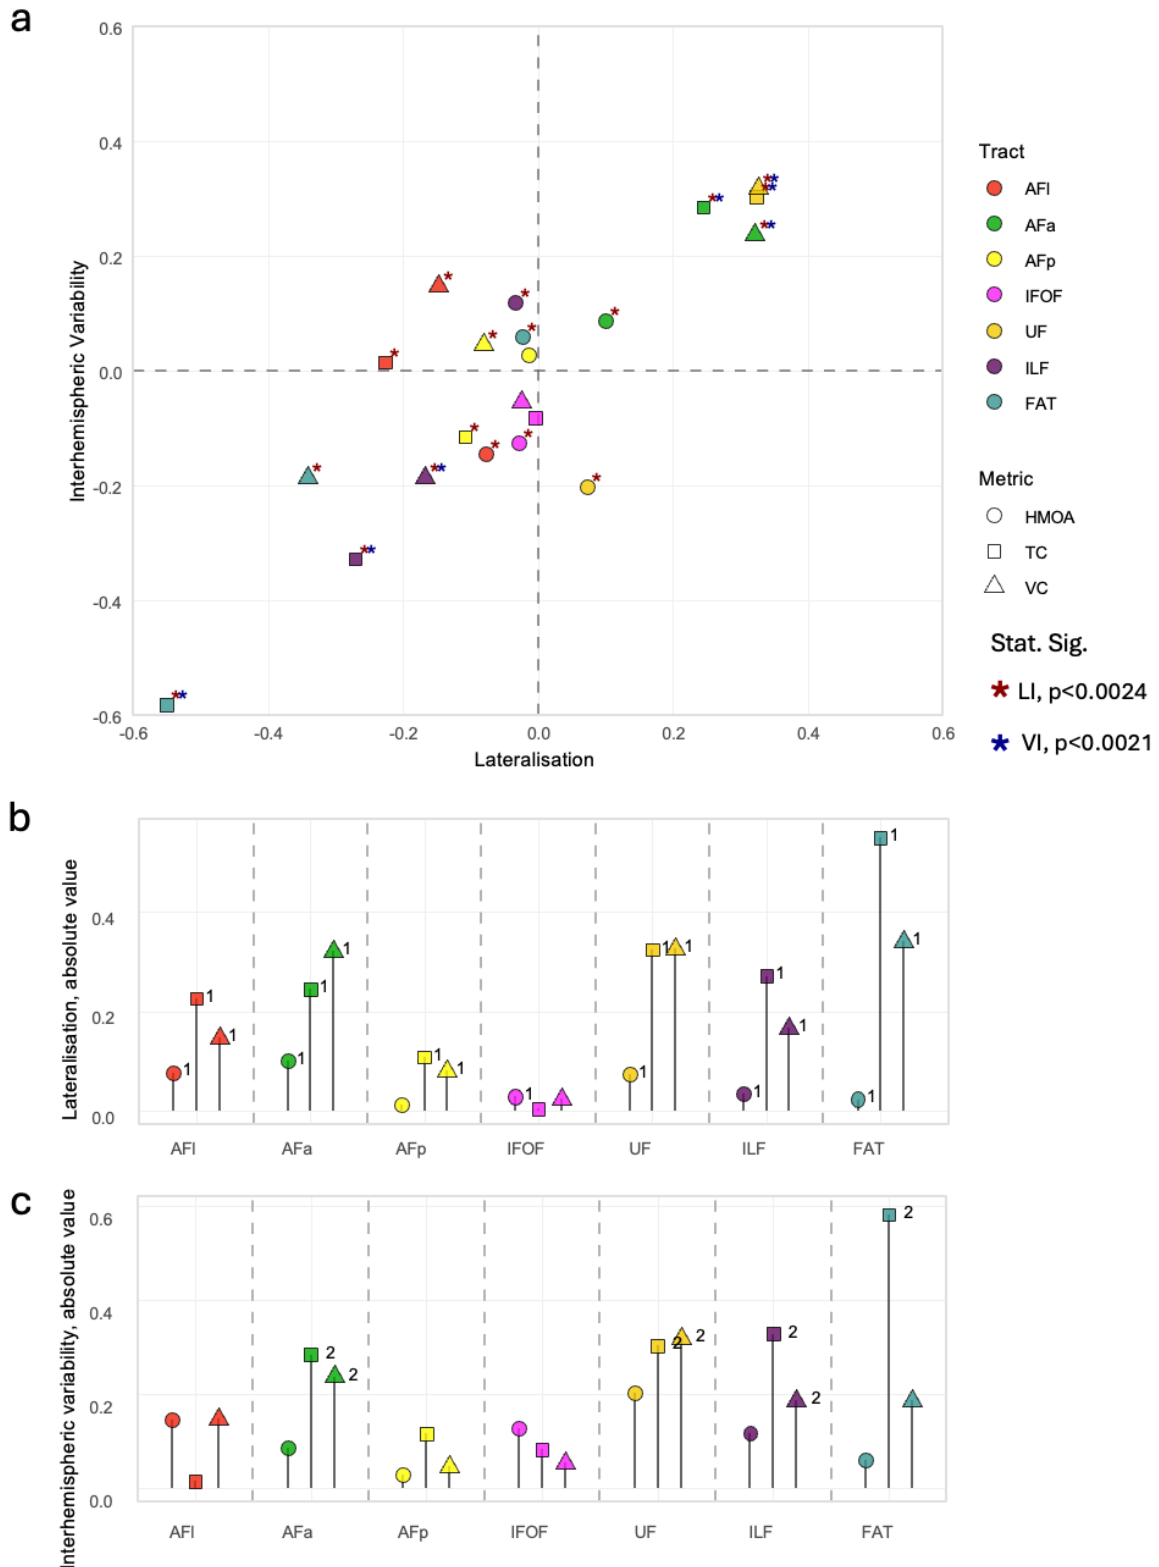

**Figure C.** Panel (a) shows a scatterplot illustrating the mean lateralisation and interhemispheric variability across tracts and metrics. Asterisks indicate statistically significant results after Bonferroni correction for lateralisation (dark red) and variability (dark blue) analyses. Panels (b) and (c) display the magnitude of lateralisation and interhemispheric variability, respectively, across tracts and metrics. The label/digit “1” denotes statistically significant results from the lateralisation analysis (within-tract, see Fig. A), and the label/digit “2” denotes significance from the variability analysis (within-tract, see Fig 2A from main analysis). AFI = long segment of the arcuate fasciculus; AFa = anterior segment, AFp = posterior segment, IFOF = inferior fronto-occipital

fasciculus; UF = uncinate fasciculus, ILF = inferior longitudinal fasciculus, FAT = frontal aslant tract, HMOA = hindrance modulated orientational anisotropy, TC = track count, VC = voxel count, LI = lateralisation index, VI = variability index.

### Handedness and Structural Lateralisation

To assess whether handedness is correlated with white matter lateralisation in the seven language-related tracts, we calculated Pearson's correlation coefficients between the laterality indices of each tract and hand preference per participant, as measured by the Edinburgh Handedness Inventory (EHI; Oldfield, 1971). Bonferroni correction was applied to account for multiple comparisons. No significant correlations were observed after Bonferroni correction for multiple comparisons ( $\alpha = 0.0024$ ; see Figure C).

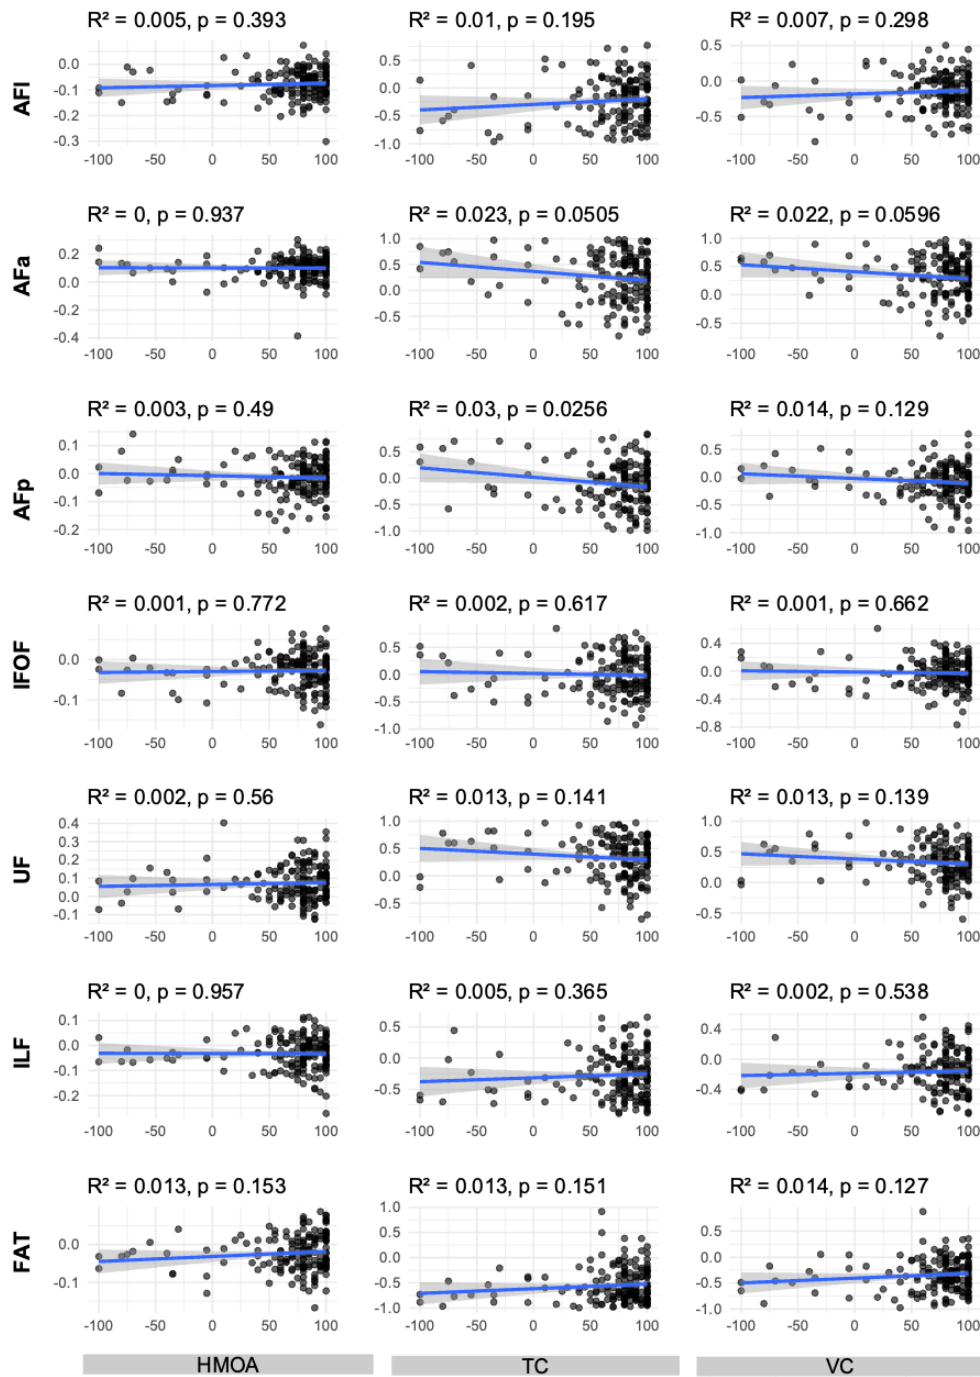

**Figure D.** Correlation between Edinburgh Handedness Inventory (EHI) scores and lateralisation indices (LI) of seven language-recruited tracts. Each plot shows the relationship between individual handedness scores and tract LI values. Significance was Bonferroni-corrected for multiple comparisons ( $\alpha = 0.05/21 = 0.0024$ ). Most participants were right-handed (87%), 3.5% left-handed, and 9.9% ambidextrous. No significant correlations were observed after correction, suggesting that handedness, as indexed by EHI, does not systematically predict structural lateralisation in these language-recruited tracts.

### *Structural-Functional analysis*

We assessed the relationship between structural lateralisation of language-relevant white matter tracts and performance on four language tasks from the NIH Toolbox and Human Connectome Project: Language Processing (accuracy and median reaction time), Picture Vocabulary (audio - picture matching), Oral Reading Recognition Test (visual word decoding), and Tone Discrimination (see Figure D). For each tract, we computed Pearson's correlation coefficients between the lateralisation index (LI) and behavioural performance across individuals. To control for multiple comparisons across tracts and tasks, we applied false discovery rate (FDR) correction.

The strongest association in this analysis emerged for the frontal aslant tract (FAT), where greater leftward lateralisation—based on voxel and track count—was linked to faster reaction times in the Language Processing task (VC and TC:  $r = -0.19$ ), higher accuracy in Picture Vocabulary (VC:  $r = 0.17$ , TC:  $r = 0.18$ ), and Oral Reading Recognition tasks (VC and TC:  $r = 0.15$ ). Within the arcuate fasciculus, lateralisation indices based on voxel count and track count showed negligible linear associations with the selected language tasks across all three segments ( $-0.10 < r < 0.10$ ). In contrast, HMOA-based lateralisation indices across the three segments showed moderate associations, including negative linear relation with Picture Vocabulary (AFI:  $r = -0.18$ ; AFp:  $r = -0.12$ ) and the Oral Reading Recognition tasks (AFa:  $r = -0.15$ ).

In the ventral stream, the uncinate fasciculus (UF) showed opposing effects across tasks: rightward lateralisation correlated negatively with comprehension accuracy (VC and TC:  $r = -0.13$ ) and was positively associated with Noise Discrimination test (VC and TC:  $r = 0.11$ ). The inferior longitudinal fasciculus (ILF) showed a weak positive link with Oral Reading Recognition test performance (HMOA:  $r = 0.10$ ) but negative correlation with the reaction time in language processing task (VC:  $r = -0.13$ , TC:  $r = -0.11$ ). As opposed to FAT, the voxel count and track count of the IFOF was negatively correlated with Picture Vocabulary and Oral Reading Recognition tasks (TC:  $r = -0.15$ ).

However, it is important to note that although several of these associations (i.e., those with  $r \geq 0.17$  and  $r \leq -0.17$ ) reached nominal significance ( $p < 0.05$ ), none remained statistically significant after controlling for multiple comparisons using false discovery rate (FDR) correction.

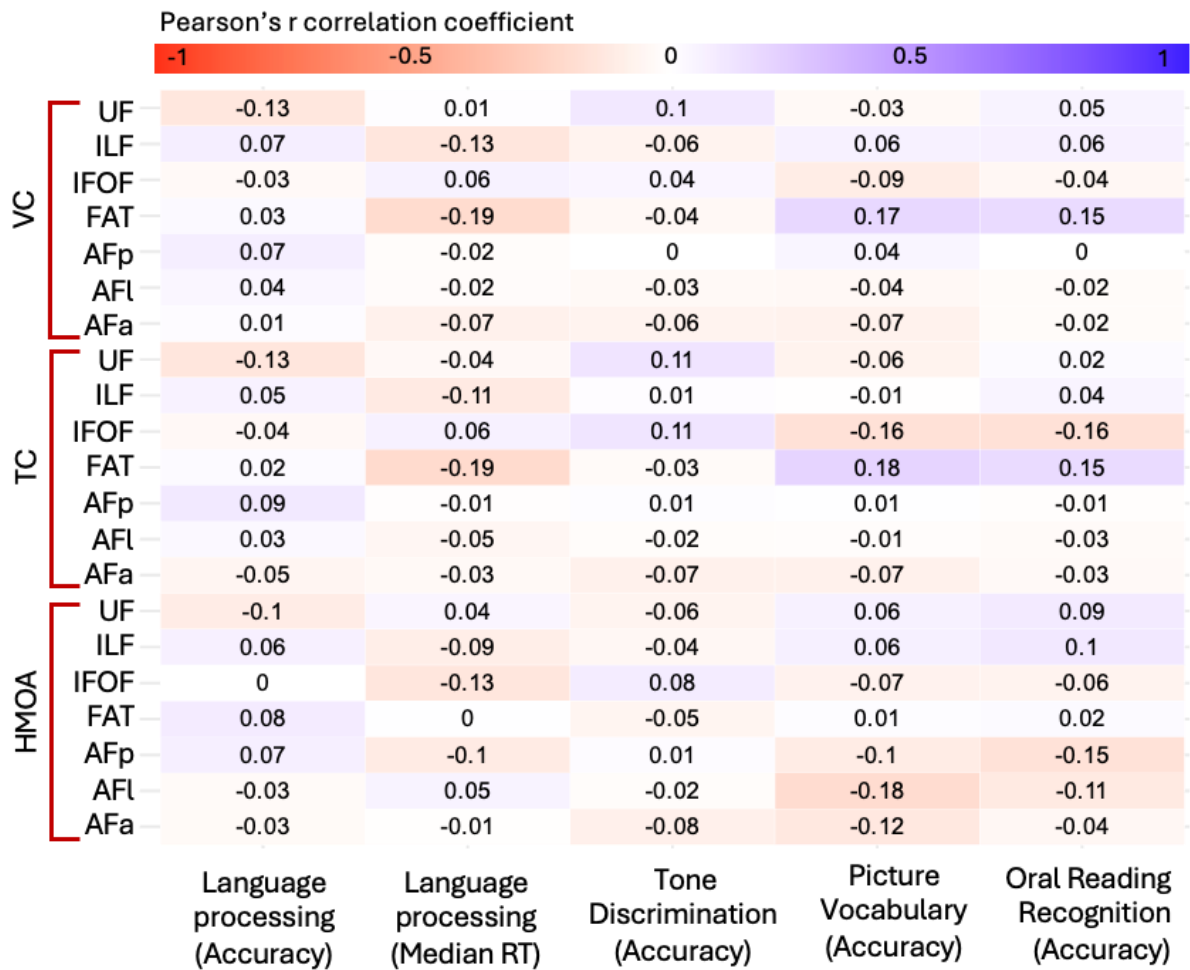

**Figure E.** Heatmap of correlations (Pearson's correlation coefficient,  $r$ ) between language-related tasks from the Human Connectome Project and lateralisation metrics of language-recruited white matter tracts. No associations remained significant after false discovery rate (FDR) correction for multiple comparisons. RT: reaction time, AFL: long segment of arcuate fasciculus, AFa: anterior segment of arcuate fasciculus, AFp: posterior segment of arcuate fasciculus, IFOF: inferior fronto-occipital fasciculus, UF: uncinate fasciculus, ILF: inferior longitudinal fasciculus, FAT: frontal aslant tract, HMOA: hindrance modulated orientational anisotropy, TC: track count, VC: voxel count

## **Note 1: Functional relevance and clinical implications of language-recruited white matter tracts**

### *Arcuate Fasciculus (three segments)*

Konstantin Von Monkow was the first to link the arcuate fasciculus with language processes which was later incorporated in the Wernicke's model (Catani and Mesulam 2008; Dick and Tremblay 2012). Since then, a significant amount of research has been conducted to explore the role of the arcuate fasciculus in language (Ivanova et al. 2016; 2021; Kargar and Jalilian 2024). According to a systematic review by Forkel et al. (2022), the long segment of the arcuate fasciculus emerged as the most frequent tract associated with language processes. For instance, the long segment plays a role in word learning (López-Barroso et al. 2013). In contrast, the posterior and anterior segments of the arcuate fasciculus are predominantly discussed in the context of attention and memory (Forkel et al. 2022). However, it is essential to note that there is substantial evidence indicating that both the anterior and posterior segments of the arcuate fasciculus are closely intertwined with language processes. For instance, research by Thiebaut de Schotten et al. (2014) demonstrated changes in white matter microstructure within the posterior segment during literacy acquisition, which is consistent with a study by Ng et al. (2021). In their research, the disconnection of the posterior arcuate fasciculus resulted in alexia (Ng et al. 2021). Additionally, deficits in repetition among patients with primary progressive aphasia were shown to correlate with the reduced volume of the posterior segment (Forkel et al. 2020). In contrast, alterations in the anterior segment were associated with speech rate (Forkel et al. 2020). These findings are consistent with the results reported by Fridriksson et al. (2013) who studied 64 chronic left hemisphere stroke patients and demonstrated that the anterior segment correlated with decreased speech fluency (Fridriksson et al. 2013). However, Ivanova et al. (2021) reported no significant correlations between the volume and HMOA of the anterior segment and language processes, as assessed through various language-related tasks, including composite score fluency (Ivanova et al. 2021). Research is still needed to clarify the role of different segments of the left arcuate fasciculus. Hence, studying the left arcuate fasciculus and its segments remains an ongoing and multifaceted research endeavour. This complexity primarily arises from various paradigms, various tests and assessment methods, differences in dissection techniques, and individual variability across populations.

Recent work by Basile et al. (2024) advances this segmentation framework by combining diffusion tractography and resting-state fMRI to uncover a tripartite functional parcellation of the frontotemporal arcuate fasciculus (Basile et al. 2024). Using a hybrid method known as track-weighted dynamic functional connectivity, they identified ventral, middle, and dorsal AF clusters that show distinct patterns of functional connectivity and meta-analytic term associations. The ventral cluster was linked to phonological and auditory processing (e.g., pitch, voice), the middle cluster to semantic integration and higher-order language functions, and the dorsal cluster to non-linguistic cognitive domains. Notably, these findings support a morpho-functional dissociation within the AF that refines classic dual-stream models by showing how subsegments of the arcuate support distinct aspects of language production and comprehension. In addition, the observation that the middle segment of the right arcuate is particularly implicated in social communication and mentalising (Basile et al. 2024), potentially points to a possible dissociation between affective-pragmatic and core linguistic processing streams.

While research on the left arcuate fasciculus has been a central focus since the 19th century, the exploration of the right hemisphere, particularly the right arcuate fasciculus, is still in its early stages and has not been studied as extensively as its left hemisphere counterpart (Thiebaut de Schotten et al. 2020). There is growing

evidence supporting the hypothesis about the role of the right arcuate fasciculus as a potential compensatory tract following damage to the left hemisphere (Chupina et al. 2022; Forkel, Thiebaut de Schotten, Dell'Acqua, et al. 2014; Kourtidou et al. 2021; Pani et al. 2016; Riès et al. 2016; but see Geva et al. 2015). Such compensatory reorganisation aligns with frameworks of functional degeneracy, whereby multiple structural pathways can support overlapping cognitive functions, particularly in the context of recovery or developmental adaptation (Price and Friston 2002). In developmental disorders, the high integrity of the right arcuate correlates with better language performance (Paldino et al. 2016). Nonetheless, aphasia can also occur after right hemisphere strokes in right-handed individuals, implying that the right hemisphere in those patients plays a significant role in language processes even before stroke. This phenomenon, crossed aphasia, has been documented in several studies (Alexander and Annett 1996; Dewarrat et al. 2009). Even if we consider these cases as "atypical" in terms of language lateralisation, there is evidence for the right hemisphere's involvement in language processes such as prosody (Sheppard et al. 2020) and affective language (Blake et al. 2002). The importance of the right hemisphere in language was discussed by the pioneering neurologist Hughlings Jackson a decade after Broca's publication (Hughlings Jackson 1874). Jackson's theory of language encompassed both intellectual or voluntary and emotional or automatic language, with the latter being primarily supported by the right hemisphere and preserved in patients with aphasia (Hughlings Jackson 1879; 1874). Further research on automatic and emotional language has the potential to enhance our understanding of involuntary, automatic and emotional speech in patients with Tourette's syndrome (Lanser et al. 1993; Yang et al. 2021), preserved ability to sing in patients with language disorders (Schlaug et al. 2008), language deficits in schizophrenia (Mitchell and Crow 2005). However, it remains unclear whether the right arcuate fasciculus, among all the white matter tracts related to language in the right hemisphere, plays a dominant role in these language processes.

In summary, the functional roles of the arcuate fasciculus and its segments remain topics of ongoing research and debate. There is a growing interest in the role of the right hemisphere in language and the arcuate fasciculus, both in terms of its potential to compensate for language dysfunction following left hemisphere stroke and its inherent involvement in language functions. Whether these segmental roles generalise across language typologies or reflect experience-dependent plasticity remains to be fully tested, particularly in tonal, agglutinative, or signed languages.

### *Inferior Fronto-Occipital Fasciculus*

The IFOF is a white matter tract that connects the ventro-medial occipital cortex with the polar and orbital frontal cortex (Forkel, Thiebaut de Schotten, Kawadler, et al. 2014). Research has established the left IFOF's crucial role in language processes, with studies demonstrating its involvement in both verbal and non-verbal semantic functions. (Almairac et al. 2015; Duffau et al. 2005; but see Giampiccolo et al. 2025).

Almairac et al. (2015) found that patients with greater infiltration of the left IFOF by diffuse low-grade glioma showed significantly poorer performance on semantic fluency tasks compared to phonological fluency tasks, though these patients also presented with both semantic and phonological paraphasias during intraoperative axonal stimulation. Extending beyond verbal tasks, Moritz-Gasser et al. (2013) demonstrated the left IFOF's involvement in non-verbal semantic processes, specifically in matching pictures from the same category across different input modalities (verbal, visual, and auditory). Notably, stimulation of the left IFOF during surgery induced anosognosia, leaving patients unaware of their errors, a finding that aligns with (Pacella et al. 2020), who

reported that damage to 30% of the left IFOF (among other tracts) was associated with anosognosia following traumatic brain injury.

While the left hemisphere's dominance in semantic processing has been well-established, recent evidence suggests a more nuanced picture of lateralisation. Herbet et al. (2017) challenged conventional understanding by demonstrating that stimulation of the right IFOF during awake brain surgery also impacted patients' non-verbal semantic processes. This finding suggests bilateral involvement in semantic processing, though the authors noted that their results do not exclude the right IFOF's potential role in verbal semantic processes, as some patients exhibited verbal semantic paraphasias during picture naming tasks.

Collectively, these findings indicate that the Inferior Fronto-Occipital fasciculus contributes to both verbal and non-verbal semantic processes across both hemispheres, suggesting a more distributed model of semantic processing than traditionally conceived.

### *Uncinate Fasciculus*

The role of the left UF has predominantly been explored in the context of psychiatric disorders (Craig et al. 2009; Forkel et al. 2022). In language, the function of the UF remains a subject of extensive debate (for the discussion, see Von Der Heide et al. 2013). Evidence from direct electrical stimulation of the UF during awake surgery in patients with low-grade glioma has not been shown to induce semantic paraphasias or picture naming errors (Duffau et al. 2009). However, a lesion study by Catani et al. (2013) demonstrated that the degeneration of the left UF in primary progressive aphasia was correlated with the performance on picture naming tasks, such as the Boston Naming Task, while abnormalities in the Frontal Aslant Tract were linked to verbal fluency (Catani et al., 2013). Other lesion studies report that the retrieval of proper names of individuals was associated with both the left UF (Papagno et al. 2011; 2016) and the cortical regions connected by the left UF (Giussani et al. 2011). Two extensive systematic reviews, conducted by Von Der Heide et al. (2013) and Cocquyt et al. (2020), raised doubts about the role of the left UF in general semantic processes. On the contrary, recent diffusion study has indicated that the right UF is implicated in phonological and lexical-semantic verbal short-term memory abilities (Olivé et al. 2023).

In summary, the Uncinate Fasciculus has been functionally associated with naming abilities, although it's important to note that some controversies persist. Furthermore, the role of UF anatomical asymmetry remains a topic for future research.

### *Inferior Longitudinal Fasciculus*

The left and right ILFs appear to display chameleon-like behaviour. Their role in various functions depends on the condition or context, such as a behavioural task chosen by the researcher. An extensive review by Herbet et al. (2018) demonstrated that in the literature, the ILF has been linked to face recognition, emotions, visual memory, semantic and lexical processes, object recognition, and reading (Herbet et al. 2018). Most of these functions were proposed in the original description of its anatomy using tractography (Catani et al. 2003).

Regarding the role of the hemispheric specialisation of the ILF in language processes (e.g., reading), it is not yet clear if only the left ILF is recruited during language-related tasks. For example, Horowitz-Kraus et al. (2014) demonstrated that the mean FA values of the right ILF significantly correlated with the ability to read words fluently, while the mean FA of the right AF was associated with reading comprehension (Horowitz-Kraus et al. 2014). However, Feldman et al. (2012) showed a negative correlation between the FA values of the right ILF and reading comprehension (Feldman et al. 2012). In contrast, Thiebaut de Schotten et al. (2014) found no

significant correlation between reading performance and the FA values of the ILF in both hemispheres (Thiebaut de Schotten et al. 2014).

In summary, the Inferior Longitudinal Fasciculus has been functionally implicated in a wide array of cognitive processes—from reading to emotion and object recognition—with emerging evidence suggesting its role may be flexibly modulated by task demands and hemispheric specialisation.

### *Frontal Aslant Tract*

Due to the FAT's connection between pre- and supplementary motor regions with the inferior frontal gyrus in the left hemisphere (Catani et al. 2012), researchers have been exploring the role of the FAT in language (Dick et al. 2019). Awake electrical stimulation of the left FAT in patients with frontal lobe glioma leads to temporary speech arrest or speech inhibition deficits (Fujii et al. 2015; Kinoshita et al. 2015; Vassal et al. 2014), with Kemerdere et al. (2016) demonstrating that axonal stimulation can induce stuttering, eventually progressing to mutism or speech arrest. While these findings provide valuable evidence for researchers, one should be cautious when inferring the specific role of the FAT in language, primarily for several key reasons

First, these studies establish associations between symptoms (i.e., stuttering) and FAT stimulation rather than demonstrating causation, as Jackson noted: “To locate the damage which destroys speech and to locate speech are two different things” . The stimulation findings reveal associations, but more robust theories require dissociations, ideally double-dissociations (Caplan 2018). Notably, speech arrest also occurs with direct electrical stimulation of other tracts, including the left uncinate fasciculus (Papagno et al. 2011) and the anterior segment of the arcuate fasciculus (Duffau et al. 2002). Given that these tracts are interconnected components of a broader network with nearby terminations (Mandonnet et al. 2010), stimulating one tract may disrupt another involved in speech initiation. Second, distinguishing between articulatory (motor) dysfunction and higher-order speech dysfunction (propositioning, ordering words in meaningful sentences) remains challenging, requiring new testing paradigms to disentangle these interpretations from awake surgery studies.

Neuroimaging studies using diffusion tensor imaging have begun to provide clearer dissociations. Catani et al. (2013) demonstrated that in patients with primary progressive aphasia, abnormalities in the left FAT correlated with verbal fluency deficits but not with naming or semantic processing, while the uncinate fasciculus showed the opposite pattern. However, Landers et al. (2022) found significant correlations between the right FAT's microstructural indices and letter fluency in glioma patients, with no such correlations for the left FAT. Similarly, Neef et al. (2018) identified reduced fractional anisotropy in the right FAT (alongside bilateral Superior Longitudinal Fasciculus changes) in adults who stutter compared to controls.

This bilateral complexity is further illustrated by Vallesi and Babcock's (2020) findings in healthy individuals, where greater leftward lateralisation of the FAT correlated with faster lexical decision-making but showed no relationship with verbal fluency performance (Vallesi and Babcock 2020). Collectively, these neuroimaging findings suggest that while the FAT contributes to speech initiation and fluency, its role varies across different linguistic processes and involves complex bilateral interactions.

In summary, the Frontal Aslant Tract appears central to speech initiation and fluency, but the mechanisms underlying speech disruption and the specific contributions of hemispheric asymmetry represent important areas for future research. The emerging picture suggests a nuanced role that cannot be reduced to simple unilateral language dominance models.

## Supplementary References

- Alexander, M. P., and M. Annett. 1996. "Crossed Aphasia and Related Anomalies of Cerebral Organization: Case Reports and a Genetic Hypothesis." *Brain and Language* 55 (2): 213–39. <https://doi.org/10.1006/brln.1996.0102>.
- Almairac, Fabien, Guillaume Herbet, Sylvie Moritz-Gasser, Nicolas Menjot de Champfleury, and Hugues Duffau. 2015. "The Left Inferior Fronto-Occipital Fasciculus Suberves Language Semantics: A Multilevel Lesion Study." *Brain Structure and Function* 220 (4): 1983–95. <https://doi.org/10.1007/s00429-014-0773-1>.
- Baarsen, K. M. van, M. Kleinnijenhuis, S. Jbabdi, S. N. Sotiropoulos, J. A. Grotenhuis, and A. M. van Cappellen van Walsum. 2016. "A Probabilistic Atlas of the Cerebellar White Matter." *NeuroImage* 124 (January): 724–32. <https://doi.org/10.1016/j.neuroimage.2015.09.014>.
- Basile, Gianpaolo Antonio, Victor Nozais, Angelo Quartarone, et al. 2024. "Functional Anatomy and Topographical Organization of the Frontotemporal Arcuate Fasciculus." *Communications Biology* 7 (1): 1655. <https://doi.org/10.1038/s42003-024-07274-3>.
- Blake, Margaret Lehman, Joseph R. Duffy, Penelope S. Myers, and Connie A. Tompkins. 2002. "Prevalence and Patterns of Right Hemisphere Cognitive/Communicative Deficits: Retrospective Data from an Inpatient Rehabilitation Unit." *Aphasiology* (United Kingdom) 16 (4–6): 537–47. <https://doi.org/10.1080/02687030244000194>.
- Briggs, Robert G., Arpan R. Chakraborty, Christopher D. Anderson, et al. 2019. "Anatomy and White Matter Connections of the Inferior Frontal Gyrus." *Clinical Anatomy (New York, N.Y.)* 32 (4): 546–56. <https://doi.org/10.1002/ca.23349>.
- Caplan, Bruce. 2018. "Double Dissociation." In *Encyclopedia of Clinical Neuropsychology*. Springer, Cham. [https://doi.org/10.1007/978-3-319-57111-9\\_9280](https://doi.org/10.1007/978-3-319-57111-9_9280).
- Catani, Marco, Matthew P.G. Allin, Masud Husain, et al. 2007. "Symmetries in Human Brain Language Pathways Correlate with Verbal Recall." *Proceedings of the National Academy of Sciences of the United States of America* 104 (43): 17163–68. <https://doi.org/10.1073/pnas.0702116104>.
- Catani, Marco, Flavio Dell'Acqua, Francesco Vergani, et al. 2012. "Short Frontal Lobe Connections of the Human Brain." *Cortex* 48 (2): 273–91. <https://doi.org/10.1016/j.cortex.2011.12.001>.
- Catani, Marco, Robert J. Howard, Sinisa Pajevic, and Derek K. Jones. 2002. "Virtual in Vivo Interactive Dissection of White Matter Fasciculi in the Human Brain." *NeuroImage* 17 (1): 77–94. <https://doi.org/10.1006/nimg.2002.1136>.
- Catani, Marco, Derek K. Jones, Rosario Donato, and Dominic H. Ffytche. 2003. "Occipito-Temporal Connections in the Human Brain." *Brain* 126 (9): 2093–107. <https://doi.org/10.1093/brain/awg203>.
- Catani, Marco, and Marsel Mesulam. 2008. "The Arcuate Fasciculus and the Disconnection Theme in Language and Aphasia: History and Current State." *Cortex; a Journal Devoted to the Study of the Nervous System and Behavior* 44 (8): 953–61. <https://doi.org/10.1016/j.cortex.2008.04.002>.
- Catani, Marco, Marsel M. Mesulam, Estrid Jakobsen, et al. 2013. "A Novel Frontal Pathway Underlies Verbal Fluency in Primary Progressive Aphasia." *Brain: A Journal of Neurology* 136 (Pt 8): 2619–28. <https://doi.org/10.1093/brain/awt163>.
- Catani, Marco, and Michel Thiebaut de Schotten. 2008. "A Diffusion Tensor Imaging Tractography Atlas for Virtual in Vivo Dissections." *Cortex* 44 (8): 1105–32. <https://doi.org/10.1016/j.cortex.2008.05.004>.
- Chupina, Irina, Joanna Sierpowska, Xiaochen Y. Zheng, Anna Dewenter, Maria-Carla Piastra, and Vitória Piai. 2022. "Time Course of Right-Hemisphere Recruitment during Word Production Following Left-

- Hemisphere Damage: A Single Case of Young Stroke.” *The European Journal of Neuroscience* 56 (8): 5235–59. <https://doi.org/10.1111/ejn.15813>.
- Cocquyt, E. -M., E. Lanckmans, P. van Mierlo, et al. 2020. “The White Matter Architecture Underlying Semantic Processing: A Systematic Review.” *Neuropsychologia* 136 (January): 107182. <https://doi.org/10.1016/j.neuropsychologia.2019.107182>.
- Craig, M. C., M. Catani, Q. Deeley, et al. 2009. “Altered Connections on the Road to Psychopathy.” *Molecular Psychiatry* 14 (10): 946–53, 907. <https://doi.org/10.1038/mp.2009.40>.
- Dewarrat, Géraldine Maillard, Jean-Marie Annoni, Eleonora Fornari, Antonio Carota, Julien Bogousslavsky, and Philippe Maeder. 2009. “Acute Aphasia after Right Hemisphere Stroke.” *Journal of Neurology* 256 (9): 1461–67. <https://doi.org/10.1007/s00415-009-5137-z>.
- Dick, Anthony Steven, Dea Garic, Paulo Graziano, and Pascale Tremblay. 2019. “The Frontal Aslant Tract (FAT) and Its Role in Speech, Language and Executive Function.” *Cortex; a Journal Devoted to the Study of the Nervous System and Behavior* 111 (February): 148–63. <https://doi.org/10.1016/j.cortex.2018.10.015>.
- Dick, Anthony Steven, and Pascale Tremblay. 2012. “Beyond the Arcuate Fasciculus: Consensus and Controversy in the Connectional Anatomy of Language.” *Brain: A Journal of Neurology* 135 (Pt 12): 3529–50. <https://doi.org/10.1093/brain/aws222>.
- Duffau, Hugues, Laurent Capelle, Nicole Sichez, et al. 2002. “Intraoperative Mapping of the Subcortical Language Pathways Using Direct Stimulations: An Anatomico-functional Study.” *Brain* 125 (1): 199–214. <https://doi.org/10.1093/brain/awf016>.
- Duffau, Hugues, Peggy Gatignol, Emmanuel Mandonnet, Philippe Peruzzi, Nathalie Tzourio-Mazoyer, and Laurent Capelle. 2005. “New Insights into the Anatomico-Functional Connectivity of the Semantic System: A Study Using Cortico-Subcortical Electrostimulations.” *Brain: A Journal of Neurology* 128 (Pt 4): 797–810. <https://doi.org/10.1093/brain/awh423>.
- Duffau, Hugues, Peggy Gatignol, Sylvie Moritz-Gasser, and Emmanuel Mandonnet. 2009. “Is the Left Uncinate Fasciculus Essential for Language? A Cerebral Stimulation Study.” *Journal of Neurology* 256 (3): 382–89. <https://doi.org/10.1007/s00415-009-0053-9>.
- Feldman, Heidi M., Eliana S. Lee, Jason D. Yeatman, and Kristen W. Yeom. 2012. “Language and Reading Skills in School-Aged Children and Adolescents Born Preterm Are Associated with White Matter Properties on Diffusion Tensor Imaging.” *Neuropsychologia* 50 (14): 3348–62. <https://doi.org/10.1016/j.neuropsychologia.2012.10.014>.
- Forkel, Stephanie J., Patrick Friedrich, Michel Thiebaut de Schotten, and Henrietta Howells. 2022. “White Matter Variability, Cognition, and Disorders: A Systematic Review.” *Brain Structure and Function* 227 (2): 529–44. <https://doi.org/10.1007/s00429-021-02382-w>.
- Forkel, Stephanie J., Emily Rogalski, Niki Drossinos Sancho, et al. 2020. “Anatomical Evidence of an Indirect Pathway for Word Repetition.” *Neurology* 94 (6): e594–606. <https://doi.org/10.1212/WNL.00000000000008746>.
- Forkel, Stephanie J., Michel Thiebaut de Schotten, Flavio Dell’Acqua, et al. 2014. “Anatomical Predictors of Aphasia Recovery: A Tractography Study of Bilateral Perisylvian Language Networks.” *Brain* 137 (7): 2027–39. <https://doi.org/10.1093/brain/awu113>.
- Forkel, Stephanie J., Michel Thiebaut de Schotten, Jamie M. Kawadler, Flavio Dell’Acqua, Adrian Danek, and Marco Catani. 2014. “The Anatomy of Fronto-Occipital Connections from Early Blunt Dissections to Contemporary Tractography.” *Cortex* 56: 73–84. <https://doi.org/10.1016/j.cortex.2012.09.005>.
- Fridriksson, Julius, Dazhou Guo, Paul Fillmore, Audrey Holland, and Chris Rorden. 2013. “Damage to the Anterior Arcuate Fasciculus Predicts Non-Fluent Speech Production in Aphasia.” *Brain: A Journal of Neurology* 136 (Pt 11): 3451–60. <https://doi.org/10.1093/brain/awt267>.

- Fujii, Masazumi, Satoshi Maesawa, Kazuya Motomura, et al. 2015. "Intraoperative Subcortical Mapping of a Language-Associated Deep Frontal Tract Connecting the Superior Frontal Gyrus to Broca's Area in the Dominant Hemisphere of Patients with Glioma." *Journal of Neurosurgery* 122 (6): 1390–96. <https://doi.org/10.3171/2014.10.JNS14945>.
- Geva, Sharon, Marta M. Correia, and Elizabeth A. Warburton. 2015. "Contributions of Bilateral White Matter to Chronic Aphasia Symptoms as Assessed by Diffusion Tensor MRI." *Brain and Language* 150 (November): 117–28. <https://doi.org/10.1016/j.bandl.2015.09.001>.
- Giampiccolo, Davide, Guillaume Herbet, and Hugues Duffau. 2025. "The Inferior Fronto-Occipital Fasciculus: Bridging Phylogeny, Ontogeny and Functional Anatomy." *Brain* 148 (5): 1507–25. <https://doi.org/10.1093/brain/awaf055>.
- Giussani, Carlo, Matteo Riva, Marcello Gallucci, et al. 2011. "Anatomical Correlates for Category-Specific Naming of Living and Non-Living Things." *NeuroImage* 56 (1): 323–29. <https://doi.org/10.1016/j.neuroimage.2011.01.080>.
- Guevara, Miguel, Claudio Román, Josselin Houenou, et al. 2017. "Reproducibility of Superficial White Matter Tracts Using Diffusion-Weighted Imaging Tractography." *NeuroImage* 147 (February): 703–25. <https://doi.org/10.1016/j.neuroimage.2016.11.066>.
- Guevara, P., D. Duclap, C. Poupon, et al. 2012. "Automatic Fiber Bundle Segmentation in Massive Tractography Datasets Using a Multi-Subject Bundle Atlas." *NeuroImage* 61 (4): 1083–99. <https://doi.org/10.1016/j.neuroimage.2012.02.071>.
- Hagler, Donald J., Mazyar E. Ahmadi, Joshua Kuperman, et al. 2009. "Automated White-Matter Tractography Using a Probabilistic Diffusion Tensor Atlas: Application to Temporal Lobe Epilepsy." *Human Brain Mapping* 30 (5): 1535–47. <https://doi.org/10.1002/hbm.20619>.
- Hansen, Colin B., Qi Yang, Ilwoo Lyu, et al. 2021. "Pandora: 4-D White Matter Bundle Population-Based Atlases Derived from Diffusion MRI Fiber Tractography." *Neuroinformatics* 19 (3): 447–60. <https://doi.org/10.1007/s12021-020-09497-1>.
- Herbet, Guillaume, Sylvie Moritz-Gasser, and Hugues Duffau. 2017. "Direct Evidence for the Contributive Role of the Right Inferior Fronto-Occipital Fasciculus in Non-Verbal Semantic Cognition." *Brain Structure & Function* 222 (4): 1597–610. <https://doi.org/10.1007/s00429-016-1294-x>.
- Herbet, Guillaume, Ilyess Zemmoura, and Hugues Duffau. 2018. "Functional Anatomy of the Inferior Longitudinal Fasciculus: From Historical Reports to Current Hypotheses." *Frontiers in Neuroanatomy* 12. <https://doi.org/10.3389/fnana.2018.00077>.
- Horowitz-Kraus, Tzipi, Yingying Wang, Elena Plante, and Scott K. Holland. 2014. "Involvement of the Right Hemisphere in Reading Comprehension: A DTI Study." *Brain Research* 1582 (September): 34–44. <https://doi.org/10.1016/j.brainres.2014.05.034>.
- Hua, Kegang, Jiangyang Zhang, Setsu Wakana, et al. 2008. "Tract Probability Maps in Stereotaxic Spaces: Analyses of White Matter Anatomy and Tract-Specific Quantification." *NeuroImage* 39 (1): 336–47. <https://doi.org/10.1016/j.neuroimage.2007.07.053>.
- Hughlings Jackson, John. 1874. "On the Nature of the Duality of the Brain." *Medical Press and Circular* 1: 80–86.
- Hughlings Jackson, John. 1879. "On Affections of Speech from Disease of the Brain." *Brain* 2 (2): 203–22. <https://doi.org/10.1093/brain/2.2.203>.
- Ivanova, Maria V., Dmitry Yu. Isaev, Olga V. Dragoy, et al. 2016. "Diffusion-Tensor Imaging of Major White Matter Tracts and Their Role in Language Processing in Aphasia." *Cortex* 85 (December): 165–81. <https://doi.org/10.1016/j.cortex.2016.04.019>.

- Ivanova, Maria V., Allison Zhong, And Turken, Juliana V. Baldo, and Nina F. Dronkers. 2021. "Functional Contributions of the Arcuate Fasciculus to Language Processing." *Frontiers in Human Neuroscience* 15: 672665. <https://doi.org/10.3389/fnhum.2021.672665>.
- Kargar, Yasin, and Milad Jalilian. 2024. "Anatomo-Functional Profile of White Matter Tracts in Relevance to Language: A Systematic Review." *Journal of Neurolinguistics* 69 (February): 101175. <https://doi.org/10.1016/j.jneuroling.2023.101175>.
- Kemerdere, Rahsan, Nicolas Menjot de Champfleury, Jérémy Deverdun, et al. 2016. "Role of the Left Frontal Aslant Tract in Stuttering: A Brain Stimulation and Tractographic Study." *Journal of Neurology* 263 (1): 157–67. <https://doi.org/10.1007/s00415-015-7949-3>.
- Kinoshita, Masashi, Nicolas Menjot de Champfleury, Jeremy Deverdun, Sylvie Moritz-Gasser, Guillaume Herbet, and Hugues Duffau. 2015. "Role of Fronto-Striatal Tract and Frontal Aslant Tract in Movement and Speech: An Axonal Mapping Study." *Brain Structure & Function* 220 (6): 3399–412. <https://doi.org/10.1007/s00429-014-0863-0>.
- Kourtidou, Evie, Dimitrios Kasselimis, Georgia Angelopoulou, et al. 2021. "The Role of the Right Hemisphere White Matter Tracts in Chronic Aphasic Patients After Damage of the Language Tracts in the Left Hemisphere." *Frontiers in Human Neuroscience* 15 (June). <https://doi.org/10.3389/fnhum.2021.635750>.
- Landers, Maud J. F., Stephan P. L. Meesters, Martine van Zandvoort, Wouter de Baene, and Geert-Jan M. Rutten. 2022. "The Frontal Aslant Tract and Its Role in Executive Functions: A Quantitative Tractography Study in Glioma Patients." *Brain Imaging and Behavior* 16 (3): 1026–39. <https://doi.org/10.1007/s11682-021-00581-x>.
- Lanser, J. B. K., W. H. C. Van Santen, A. Jennekens-Schinkel, and R. a. C. Roos. 1993. "Tourette's Syndrome and Right Hemisphere Dysfunction." *The British Journal of Psychiatry* 163 (1): 116–18. <https://doi.org/10.1192/bjp.163.1.116>.
- Latini, Francesco, Johanna Mårtensson, Elna Marie Larsson, et al. 2017. "Segmentation of the Inferior Longitudinal Fasciculus in the Human Brain: A White Matter Dissection and Diffusion Tensor Tractography Study." *Brain Research* 1675: 102–15. <https://doi.org/10.1016/j.brainres.2017.09.005>.
- Li, Yijie, Wei Zhang, Ye Wu, et al. 2024. "A Diffusion MRI Tractography Atlas for Concurrent White Matter Mapping across Eastern and Western Populations." *Scientific Data* 11 (July): 787. <https://doi.org/10.1038/s41597-024-03624-2>.
- López-Barroso, Diana, Marco Catani, Pablo Ripollés, Flavio Dell'Acqua, Antoni Rodríguez-Fornells, and Ruth de Diego-Balaguer. 2013. "Word Learning Is Mediated by the Left Arcuate Fasciculus." *Proceedings of the National Academy of Sciences* 110 (32): 13168–73. <https://doi.org/10.1073/pnas.1301696110>.
- Maffei, C., C. Lee, M. Planich, et al. 2021. "Using Diffusion MRI Data Acquired with Ultra-High Gradient Strength to Improve Tractography in Routine-Quality Data." *NeuroImage* 245 (December): 118706. <https://doi.org/10.1016/j.neuroimage.2021.118706>.
- Mandonnet, Emmanuel, Peter A. Winkler, and Hugues Duffau. 2010. "Direct Electrical Stimulation as an Input Gate into Brain Functional Networks: Principles, Advantages and Limitations." *Acta Neurochirurgica* 152 (2): 185–93. <https://doi.org/10.1007/s00701-009-0469-0>.
- Mitchell, Rachel L. C., and Tim J. Crow. 2005. "Right Hemisphere Language Functions and Schizophrenia: The Forgotten Hemisphere?" *Brain: A Journal of Neurology* 128 (Pt 5): 963–78. <https://doi.org/10.1093/brain/awh466>.
- Mori, S, S Wakana, L.M. Nagae-Poetscher, and P.C.M. van Zijl. 2005. *MRI Atlas of Human White Matter*. Elsevier. <https://shop.elsevier.com/books/mri-atlas-of-human-white-matter/mori/978-0-444-51741-8>.

- Mori, Susumu, Kenichi Oishi, Hangyi Jiang, et al. 2008. "Stereotaxic White Matter Atlas Based on Diffusion Tensor Imaging in an ICBM Template." *NeuroImage* 40 (2): 570–82. <https://doi.org/10.1016/j.neuroimage.2007.12.035>.
- Moritz-Gasser, Sylvie, Guillaume Herbet, and Hugues Duffau. 2013. "Mapping the Connectivity Underlying Multimodal (Verbal and Non-Verbal) Semantic Processing: A Brain Electrostimulation Study." *Neuropsychologia* 51 (10): 1814–22. <https://doi.org/10.1016/j.neuropsychologia.2013.06.007>.
- Neef, Nicole E, Alfred Anwander, Christoph Büttner, et al. 2018. "Structural Connectivity of Right Frontal Hyperactive Areas Scales with Stuttering Severity." *Brain* 141 (1): 191–204. <https://doi.org/10.1093/brain/awx316>.
- Ng, Sam, Sylvie Moritz-Gasser, Anne-Laure Lemaitre, Hugues Duffau, and Guillaume Herbet. 2021. "White Matter Disconnectivity Fingerprints Causally Linked to Dissociated Forms of Alexia." *Communications Biology* 4 (1): 1413. <https://doi.org/10.1038/s42003-021-02943-z>.
- O'Donnell, Lauren J., Yannick Suter, Laura Rigolo, et al. 2017. "Automated White Matter Fiber Tract Identification in Patients with Brain Tumors." *NeuroImage: Clinical* 13 (January): 138–53. <https://doi.org/10.1016/j.nicl.2016.11.023>.
- O'Donnell, Lauren J., and Carl-Fredrik Westin. 2007. "Automatic Tractography Segmentation Using a High-Dimensional White Matter Atlas." *IEEE Transactions on Medical Imaging* 26 (11): 1562–75. <https://doi.org/10.1109/TMI.2007.906785>.
- Oldfield, R. C. 1971. "The Assessment and Analysis of Handedness: The Edinburgh Inventory." *Neuropsychologia* 9 (1): 97–113. [https://doi.org/10.1016/0028-3932\(71\)90067-4](https://doi.org/10.1016/0028-3932(71)90067-4).
- Olivé, Guillem, Claudia Peñaloza, Lucía Vaquero, Matti Laine, Nadine Martin, and Antoni Rodríguez-Fornells. 2023. "The Right Uncinate Fasciculus Supports Verbal Short-Term Memory in Aphasia." *Brain Structure & Function* 228 (3–4): 875–93. <https://doi.org/10.1007/s00429-023-02628-9>.
- Pacella, Valentina, Michele Scandola, Maddalena Beccherle, et al. 2020. "Anosognosia for Theory of Mind Deficits: A Single Case Study and a Review of the Literature." *Neuropsychologia* 148 (November): 107641. <https://doi.org/10.1016/j.neuropsychologia.2020.107641>.
- Paldino, M.J., K. Hedges, and F. Golriz. 2016. "The Arcuate Fasciculus and Language Development in a Cohort of Pediatric Patients with Malformations of Cortical Development." *AJNR: American Journal of Neuroradiology* 37 (1): 169–75. <https://doi.org/10.3174/ajnr.A4461>.
- Pani, Ethan, Xin Zheng, Jasmine Wang, Andrea Norton, and Gottfried Schlaug. 2016. "Right Hemisphere Structures Predict Poststroke Speech Fluency." *Neurology* 86 (17): 1574–81. <https://doi.org/10.1212/WNL.0000000000002613>.
- Papagno, Costanza, Alessandra Casarotti, Alessandro Comi, et al. 2016. "Long-Term Proper Name Anomia after Removal of the Uncinate Fasciculus." *Brain Structure & Function* 221 (1): 687–94. <https://doi.org/10.1007/s00429-014-0920-8>.
- Papagno, Costanza, Christiano Miracapillo, Alessandra Casarotti, et al. 2011. "What Is the Role of the Uncinate Fasciculus? Surgical Removal and Proper Name Retrieval." *Brain* 134 (2): 405–14. <https://doi.org/10.1093/brain/awq283>.
- Price, Cathy J., and Karl J. Friston. 2002. "Degeneracy and Cognitive Anatomy." *Trends in Cognitive Sciences* 6 (10): 416–21. [https://doi.org/10.1016/s1364-6613\(02\)01976-9](https://doi.org/10.1016/s1364-6613(02)01976-9).
- Radwan, Ahmed M., Stefan Sunaert, Kurt Schilling, et al. 2022. "An Atlas of White Matter Anatomy, Its Variability, and Reproducibility Based on Constrained Spherical Deconvolution of Diffusion MRI." *NeuroImage* 254 (July): 119029. <https://doi.org/10.1016/j.neuroimage.2022.119029>.

- Riès, Stéphanie K., Nina F. Dronkers, and Robert T. Knight. 2016. "Choosing Words: Left Hemisphere, Right Hemisphere, or Both? Perspective on the Lateralization of Word Retrieval." *Annals of the New York Academy of Sciences* 1369 (1): 111–31. <https://doi.org/10.1111/nyas.12993>.
- Rojkova, K., E. Volle, M. Urbanski, F. Humbert, F. Dell'Acqua, and M. Thiebaut de Schotten. 2016. "Atlasing the Frontal Lobe Connections and Their Variability Due to Age and Education: A Spherical Deconvolution Tractography Study." *Brain Structure & Function* 221 (3): 1751–66. <https://doi.org/10.1007/s00429-015-1001-3>.
- Román, Claudio, Miguel Guevara, Ronald Valenzuela, et al. 2017. "Clustering of Whole-Brain White Matter Short Association Bundles Using HARDI Data." *Frontiers in Neuroinformatics* 11 (December). <https://doi.org/10.3389/fninf.2017.00073>.
- Román, Claudio, Cecilia Hernández, Miguel Figueroa, et al. 2022. "Superficial White Matter Bundle Atlas Based on Hierarchical Fiber Clustering over Probabilistic Tractography Data." *NeuroImage* 262 (November): 119550. <https://doi.org/10.1016/j.neuroimage.2022.119550>.
- Ros, Christian, Daniel Güllmar, Martin Stenzel, Hans-Joachim Mentzel, and Jürgen Rainer Reichenbach. 2013. "Atlas-Guided Cluster Analysis of Large Tractography Datasets." *PLOS ONE* 8 (12): e83847. <https://doi.org/10.1371/journal.pone.0083847>.
- Schlaug, Gottfried, Sarah Marchina, and Andrea Norton. 2008. "From Singing to Speaking: Why Singing May Lead to Recovery of Expressive Language Function in Patients with Broca's Aphasia." *Music Perception* 25 (4): 315–23. <https://doi.org/10.1525/MP.2008.25.4.315>.
- Sheppard, Shannon M., Lynsey M. Keator, Bonnie L. Breining, et al. 2020. "Right Hemisphere Ventral Stream for Emotional Prosody Identification: Evidence from Acute Stroke." *Neurology* 94 (10): e1013–20. <https://doi.org/10.1212/WNL.0000000000008870>.
- Shu, Ni, Yaou Liu, Yunyun Duan, and Kuncheng Li. 2015. "Hemispheric Asymmetry of Human Brain Anatomical Network Revealed by Diffusion Tensor Tractography." *BioMed Research International* 2015. <https://doi.org/10.1155/2015/908917>.
- Suarez, Ralph O., Olivier Commowick, Sanjay P. Prabhu, and Simon K. Warfield. 2012. "Automated Delineation of White Matter Fiber Tracts with a Multiple Region-of-Interest Approach." *Neuroimage* 59 (4): 3690–700. <https://doi.org/10.1016/j.neuroimage.2011.11.043>.
- Tang, Yuchun, Wei Sun, Arthur W. Toga, John M. Ringman, and Yonggang Shi. 2018. "A Probabilistic Atlas of Human Brainstem Pathways Based on Connectome Imaging Data." *NeuroImage* 169 (April): 227–39. <https://doi.org/10.1016/j.neuroimage.2017.12.042>.
- Thiebaut de Schotten, Michel, Laurent Cohen, Eduardo Amemiya, Lucia W. Braga, and Stanislas Dehaene. 2014. "Learning to Read Improves the Structure of the Arcuate Fasciculus." *Cerebral Cortex (New York, N.Y.: 1991)* 24 (4): 989–95. <https://doi.org/10.1093/cercor/bhs383>.
- Thiebaut de Schotten, Michel, Dominic H. Ffytche, Alberto Bizzi, et al. 2011. "Atlasing Location, Asymmetry and Inter-Subject Variability of White Matter Tracts in the Human Brain with MR Diffusion Tractography." *NeuroImage* 54 (1): 49–59. <https://doi.org/10.1016/j.neuroimage.2010.07.055>.
- Thiebaut de Schotten, Michel, Chris Foulon, and Parashkev Nachev. 2020. "Brain Disconnections Link Structural Connectivity with Function and Behaviour." *Nature Communications*, ahead of print. <https://doi.org/10.1038/s41467-020-18920-9>.
- Vallesi, Antonino, and Laura Babcock. 2020. "Asymmetry of the Frontal Aslant Tract Is Associated with Lexical Decision." *Brain Structure and Function* 225 (3): 1009–17. <https://doi.org/10.1007/s00429-020-02054-1>.
- Vassal, François, Claire Boutet, Jean-Jacques Lemaire, and Christophe Nuti. 2014. "New Insights into the Functional Significance of the Frontal Aslant Tract: An Anatomico-Functional Study Using Intraoperative Electrical Stimulations Combined with Diffusion Tensor Imaging-Based Fiber

- Tracking.” *British Journal of Neurosurgery* 28 (5): 685–87.  
<https://doi.org/10.3109/02688697.2014.889810>.
- Von Der Heide, Rebecca J., Laura M. Skipper, Elizabeth Klobusicky, and Ingrid R. Olson. 2013. “Dissecting the Uncinate Fasciculus: Disorders, Controversies and a Hypothesis.” *Brain* 136 (6): 1692–707.  
<https://doi.org/10.1093/brain/awt094>.
- Wakana, Setsu, Arvind Caprihan, Martina M. Panzenboeck, et al. 2007. “Reproducibility of Quantitative Tractography Methods Applied to Cerebral White Matter.” *NeuroImage* 36 (3): 630–44.  
<https://doi.org/10.1016/j.neuroimage.2007.02.049>.
- Wu, Yupeng, Dandan Sun, Yong Wang, and Yibao Wang. 2016. “Subcomponents and Connectivity of the Inferior Fronto-Occipital Fasciculus Revealed by Diffusion Spectrum Imaging Fiber Tracking.” *Frontiers in Neuroanatomy* 10 (SEP). <https://doi.org/10.3389/fnana.2016.00088>.
- Yang, Chengmin, Li Yao, Naici Liu, et al. 2021. “Microstructural Abnormalities of White Matter Across Tourette Syndrome: A Voxel-Based Meta-Analysis of Fractional Anisotropy.” *Frontiers in Neurology* 12 (September). <https://doi.org/10.3389/fneur.2021.659250>.
- Yeh, Fang-Cheng, Sandip Panesar, David Fernandes, et al. 2018. “Population-Averaged Atlas of the Macroscale Human Structural Connectome and Its Network Topology.” *NeuroImage* 178 (September): 57–68.  
<https://doi.org/10.1016/j.neuroimage.2018.05.027>.
- Yendiki, Anastasia, Patricia Panneck, Priti Srinivasan, et al. 2011. “Automated Probabilistic Reconstruction of White-Matter Pathways in Health and Disease Using an Atlas of the Underlying Anatomy.” *Frontiers in Neuroinformatics* 5 (October): 23. <https://doi.org/10.3389/fninf.2011.00023>.
- Yoo, Sang Wook, Pamela Guevara, Yong Jeong, et al. 2015. “An Example-Based Multi-Atlas Approach to Automatic Labeling of White Matter Tracts.” *PLOS ONE* 10 (7): e0133337.  
<https://doi.org/10.1371/journal.pone.0133337>.
- Zhang, Fan, Ye Wu, Isaiah Norton, et al. 2018. “An Anatomically Curated Fiber Clustering White Matter Atlas for Consistent White Matter Tract Parcellation across the Lifespan.” *NeuroImage* 179 (October): 429–47. <https://doi.org/10.1016/j.neuroimage.2018.06.027>.
